# Supplementary material for: Pd-catalyzed intramolecular C(sp2)–H amination of phenylalanine moieties in dipeptides: synthesis of indoline-2-carboxylate-containing dipeptides
Source: Royal Society of Chemistry journal article supplement (doi:10.1039/c8ob00207j), 2018-01-01
Supplement: c8ob00207j1.pdf [file c8ob00207j1.pdf]

# Pd-catalyzed intramolecular C(sp<sup>2</sup>)-H amination of phenylalanine moieties in the dipeptides: synthesis of indoline-2-carboxylate-containing dipeptides

Yong Zheng, Weibin Song, Yefu Zhu, Bole Wei, Lijiang Xuan\*

State Key Laboratory of Drug Research, Shanghai Institute of Materia Medica,  
Chinese Academy of Sciences, 501 Haik Road, Zhangjiang Hi-Tech Park, Shanghai  
201203, China

## Table of content

|                                                                                          |       |
|------------------------------------------------------------------------------------------|-------|
| 1. General information .....                                                             | 2     |
| 2. General procedure for preparation of starting materials .....                         | 2     |
| 3. General procedure for C-H animation.....                                              | 2     |
| 4. Characterization data of <b>2a-2j</b> and <b>4a-4k</b> .....                          | 3-11  |
| 5. <sup>1</sup> H and <sup>13</sup> C NMR spectra of <b>2a-2j</b> and <b>4a-4k</b> ..... | 12-32 |

### General information

All the reagents were used without further purification.  $^1\text{H}$  and  $^{13}\text{C}$  NMR spectra were recorded on a Bruker NMR spectrometer with  $\text{CDCl}_3$  as the solvent and TMS as an internal standard. HRESIMS was measured on an Agilent G6224A TOF spectrometer. HPLC was performed on Chiralcel OD-H column (30% to 50% *i*-PrOH in hexanes, 1 mL/min),  $\lambda = 254$  nm. TLC was performed on pre-coated silica gel GF254 plates (Qingdao Marine Chemical Factory). Column chromatography was performed on silica gel (200–300 mesh, Qingdao Marine Chemical Factory). Visualization was carried out with UV or PMA staining by heating.

### General procedures for preparation of compounds 1a–1l, 3a–3i:

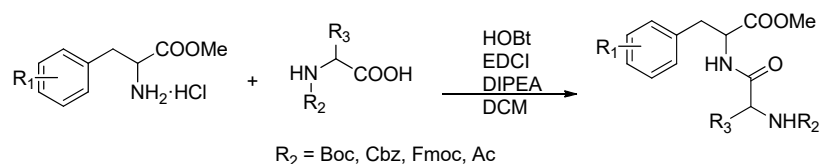

To a solution of protected-amino acid (1equiv) and phenylalanine methyl ester hydrochloride (1 equiv) in dry DCM (0.2 M) was added DIPEA (2 equiv), HOBT (1.1 equiv), and EDCI·HCl (1.2 equiv) at 0°C. After 1 h, the mixture was warmed to rt and stirred overnight. Water was added and the mixture was extracted with DCM. The combined organic layer was washed with 10% HCl, sat.  $\text{NaHCO}_3$ , and brine, dried over anhydrous  $\text{Na}_2\text{SO}_4$ , and concentrated in vacuo. The resulting residue was purified by silica gel flash chromatography (Hexane/EA) to give the desired products. **3j** and **3k** were prepared by the similar methods.

### General procedure for C–H amidation:

A mixture of peptide (0.3 mmol),  $\text{PhI}(\text{OAc})_2$  (0.6 mmol),  $\text{Pd}(\text{OAc})_2$  (5 % mol), and toluene (2 mL) in sealed tube was heated at 120 °C for 20 h. The reaction mixture was cooled to room temperature, and concentrated in vacuo. The resulting residue was purified by silica gel flash chromatography (Hexane/EA) to give the products.

## Characterization of compounds

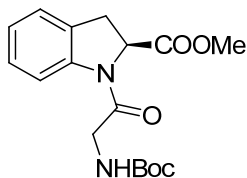

**2a**

According to the general experimental procedure, compound **2a** was obtained as yellow oil. Two amide rotamers (1.6:1) exist in NMR spectra.

Major amide rotamer:  $^1\text{H}$  NMR (400 MHz,  $\text{CDCl}_3$ )  $\delta$  8.20 (d,  $J = 7.9$  Hz, 1H), 7.28 – 7.15 (m, 2H), 7.07 (t,  $J = 7.4$  Hz, 1H), 5.58 (brs, 1H), 4.96 (d,  $J = 10.2$  Hz, 1H), 4.20 – 4.07 (m, 1H), 3.90 – 3.79 (m, 1H), 3.78 (s, 3H), 3.70 – 3.61 (m, 1H), 3.33 (d,  $J = 16.4$  Hz, 1H), 1.47 (s, 9H).

Minor amide rotamer:  $^1\text{H}$  NMR (400 MHz,  $\text{CDCl}_3$ )  $\delta$  7.28 – 7.15 (m, 3H), 7.07 (t,  $J = 7.4$  Hz, 1H), 5.56 (brs, 1H), 5.23 (d,  $J = 8.9$  Hz, 1H), 4.49 – 4.30 (m, 2H), 3.76 (s, 3H), 3.60 – 3.49 (m, 1H), 3.16 (d,  $J = 16.9$  Hz, 1H), 1.45 (s, 9H).

Mixture of amide rotamers:  $^{13}\text{C}$  NMR (101 MHz,  $\text{CDCl}_3$ )  $\delta$  171.4, 171.3, 167.3, 155.8, 142.2, 139.9, 130.7, 128.4, 128.1, 125.8, 124.6, 124.4, 124.1, 117.4, 114.1, 79.9, 60.2, 59.7, 53.2, 52.6, 45.1, 43.5, 33.7, 31.5, 28.4.

HRMS (ESI) Calcd for  $\text{C}_{17}\text{H}_{22}\text{N}_2\text{O}_5\text{Na}$  [ $\text{M}+\text{Na}^+$ ]: 357.1421, Found: 357.1416.

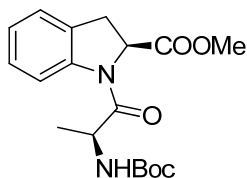

**2b**

According to the general experimental procedure, compound **2b** was obtained as yellow oil. Two amide rotamers (1.3:1) exist in NMR spectra.

Major amide rotamer:  $^1\text{H}$  NMR (400 MHz,  $\text{CDCl}_3$ )  $\delta$  8.25 (d,  $J = 8.1$  Hz, 1H), 7.35 – 7.16 (m, 2H), 7.15 – 7.00 (m, 1H), 5.27 (d,  $J = 11.1, 3.5$  Hz, 1H), 4.97 (d,  $J = 9.2$  Hz, 1H), 4.55 – 4.40 (m, 1H), 3.77 (s, 3H), 3.63 (dd,  $J = 16.4, 10.6$  Hz, 1H), 3.36 (d,  $J = 16.4$  Hz, 1H), 1.45 (s, 9H), 1.41 (d,  $J = 6.8$  Hz, 3H).

Minor amide rotamer:  $^1\text{H}$  NMR (400 MHz,  $\text{CDCl}_3$ )  $\delta$  7.35 – 7.16 (m, 3H), 7.15 – 7.00 (m, 1H), 5.52 (d,  $J = 7.5$  Hz, 1H), 5.48 (d,  $J = 8.3$  Hz, 1H), 5.10 – 5.02 (m, 1H), 3.75 (s, 3H), 3.57 – 3.45 (m, 1H), 3.13 (dd,  $J = 16.6, 3.4$  Hz, 1H), 1.55 (d,  $J = 6.9$  Hz, 3H), 1.44 (s, 9H).

Mixture of amide rotamers:  $^{13}\text{C}$  NMR (101 MHz,  $\text{CDCl}_3$ )  $\delta$  171.8, 171.7, 171.5, 171.4, 155.2, 154.8, 142.3, 139.9, 131.1, 128.7, 128.3, 128.1, 125.9, 124.6, 124.4, 124.1, 117.5, 114.1, 79.8, 79.6, 60.4, 60.2, 53.3, 52.5, 48.6, 48.4, 33.5, 31.3, 28.4, 19.9, 18.8.

HRMS (ESI) Calcd for  $\text{C}_{18}\text{H}_{24}\text{N}_2\text{O}_5\text{Na}$  [ $\text{M}+\text{Na}^+$ ]: 371.1577, Found: 371.1586.

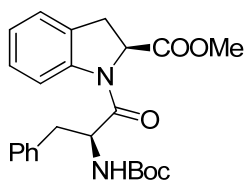

**2c**

According to the general experimental procedure, compound **2c** was obtained as yellow solid. Two amide rotamers (4:1) exist in NMR spectra.

Mixture of amide rotamers:  $^1\text{H}$  NMR (400 MHz,  $\text{CDCl}_3$ )  $\delta$  8.27 (d,  $J = 8.1$  Hz, 1H), 7.39 – 7.17 (m, 9H), 7.15 – 7.01 (m, 2.6H), 5.59 (d,  $J = 8.7$  Hz, 1H), 5.42 – 5.24 (m, 0.7H), 4.62 (td,  $J = 9.4, 5.2$  Hz, 1H), 4.14 (d,  $J = 9.0$  Hz, 1H), 3.78 (s, 0.7 H), 3.69 (s, 3H), 3.21 – 2.98 (m, 3.7H), 2.83 (dd,  $J = 16.2, 10.5$  Hz, 1H), 1.46 (s, 9H), 1.37 (s, 2.1H).

Mixture of amide rotamers:  $^{13}\text{C}$  NMR (101 MHz,  $\text{CDCl}_3$ )  $\delta$  171.2, 170.8, 154.7, 141.5, 136.2, 129.7, 129.4, 129.1, 128.7, 128.4, 127.8, 127.1, 124.6, 124.3, 117.6, 79.7, 77.4, 60.5, 60.4, 54.6, 53.1, 52.6, 41.6, 38.2, 32.8, 31.4, 28.4.

HRMS (ESI) Calcd for  $\text{C}_{24}\text{H}_{28}\text{N}_2\text{O}_5\text{Na}$  [ $\text{M}+\text{Na}^+$ ]: 447.1890, Found: 447.1884.

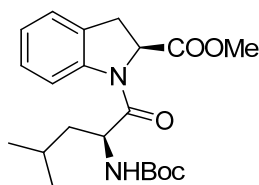

**2d**

According to the general experimental procedure, compound **2d** was obtained as yellow solid. Two amide rotamers (1.7:1) exist in NMR spectra.

Major amide rotamer:  $^1\text{H}$  NMR (400 MHz,  $\text{CDCl}_3$ )  $\delta$  8.26 (d,  $J = 8.1$  Hz, 1H), 7.40 – 7.21 (m, 2H), 5.36 – 5.33 (m, 1H), 4.98 (dd,  $J = 10.6, 1.9$  Hz, 1H), 4.47 (td,  $J = 9.8, 3.6$  Hz, 1H), 3.77 (s, 3H), 3.71 – 3.57 (m, 1H), 3.35 (d,  $J = 15.5$  Hz, 1H), 1.73-1.68 (m, 2H), 1.62 – 1.56 (m, 1H), 1.43 (s, 9H), 1.03 (d,  $J = 6.5$  Hz, 3H), 0.96 (d,  $J = 6.7$  Hz, 3H).

Minor amide rotamer:  $^1\text{H}$  NMR (400 MHz,  $\text{CDCl}_3$ )  $\delta$  7.40 – 7.21 (m, 3H), 7.06 (m, 1H), 5.36 – 5.33 (m, 1H), 5.22 (dd,  $J = 11.1, 4.2$  Hz, 1H), 5.17 – 5.14 (m, 1H), 3.74 (s, 3H), 3.56 – 3.42 (m, 1H), 3.12 (dd,  $J = 16.6, 4.0$  Hz, 1H), 1.73-1.68 (m, 2H), 1.62 – 1.56 (m, 1H), 1.42 (s, 9H), 1.16 (d,  $J = 6.5$  Hz, 3H), 1.00 (d,  $J = 6.7$  Hz, 3H).

Mixture of amide rotamers:  $^{13}\text{C}$  NMR (101 MHz,  $\text{CDCl}_3$ )  $\delta$  172.2, 172.1, 171.5, 171.4, 155.7, 155.2, 142.4, 140.1, 131.0, 128.7, 128.5, 128.1, 128.0, 125.9, 124.5, 124.4, 124.0, 117.4, 114.0, 79.7, 79.4, 60.5, 60.4, 53.3, 52.4, 51.3, 51.2, 43.7, 41.2, 33.6, 31.2, 28.3, 24.9, 24.6, 23.6, 23.4, 21.9, 21.7.

HRMS (ESI) Calcd for  $\text{C}_{21}\text{H}_{30}\text{N}_2\text{O}_5\text{Na}$  [ $\text{M}+\text{Na}^+$ ]: 413.2047, Found: 413.2046.

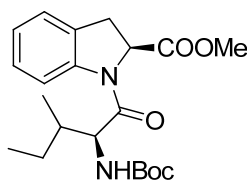

**2e**

According to the general experimental procedure, compound **2e** was obtained as yellow solid. Two amide rotamers (1.3:1) exist in NMR spectra.

Major amide rotamer:  $^1\text{H}$  NMR (400 MHz,  $\text{CDCl}_3$ )  $\delta$  8.31 (d,  $J = 8.1$  Hz, 1H), 7.27 – 7.18 (m, 2H), 7.12 – 7.05 (m, 1H), 5.34 (d,  $J = 9.4$  Hz, 1H), 5.09 (d,  $J = 9.1$  Hz, 1H), 4.32 – 4.21 (m, 1H), 3.76 (s, 3H), 3.62 (dt,  $J = 19.0, 9.5$  Hz, 1H), 3.36 (d,  $J = 16.4$  Hz, 1H), 1.76 (td,  $J = 9.9, 4.8$  Hz, 1H), 1.72 – 1.57 (m, 2H), 1.45 (s, 9H), 0.99 (d,  $J = 6.8$  Hz, 3H), 0.93 (t,  $J = 7.9$  Hz, 3H).

Minor amide rotamer:  $^1\text{H}$  NMR (400 MHz,  $\text{CDCl}_3$ )  $\delta$  7.27 – 7.18 (m, 3H), 7.12 – 7.05 (m, 1H), 5.40 (d,  $J = 9.0$  Hz, 1H), 5.26 (dd,  $J = 11.2, 4.6$  Hz, 1H), 5.03 (dd,  $J = 9.2, 3.3$  Hz, 1H), 3.74 (s, 3H), 3.50 (dd,  $J = 16.6, 11.3$  Hz, 1H), 3.15 (dd,  $J = 16.6, 4.5$  Hz, 1H), 1.76 (td,  $J = 9.9, 4.8$  Hz, 1H), 1.72 – 1.57 (m, 2H), 1.18 (d,  $J = 6.8$  Hz, 3H), 0.92 (t,  $J = 7.9$  Hz, 3H).

Mixture of amide rotamers:  $^{13}\text{C}$  NMR (101 MHz,  $\text{CDCl}_3$ )  $\delta$  171.6, 171.3, 171.0, 155.4, 142.3, 131.1, 128.9, 128.3, 128.0, 125.9, 124.6, 124.5, 124.0, 117.5, 114.0, 79.7, 79.4, 60.7, 60.5, 57.1, 56.8, 53.3, 52.4, 39.4, 37.3, 33.4, 31.2, 29.7, 28.3, 24.2, 22.6, 15.8, 15.5, 11.7, 11.4.

HRMS (ESI) Calcd for  $\text{C}_{21}\text{H}_{30}\text{N}_2\text{O}_5\text{Na}$  [ $\text{M}+\text{Na}^+$ ]: 413.2047, Found: 413.2044.

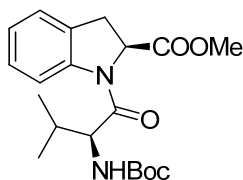

**2f**

According to the general experimental procedure, compound **2f** was obtained as yellow solid. Two amide rotamers (1.3:1) exist in NMR spectra.

Major amide rotamer:  $^1\text{H}$  NMR (400 MHz,  $\text{CDCl}_3$ )  $\delta$  8.30 (d,  $J = 8.1$  Hz, 1H), 7.35 – 7.16 (m, 2H), 7.09 – 7.05 (m, 1H), 5.37 (d,  $J = 9.4$  Hz, 1H), 5.08 (dd,  $J = 10.6, 1.8$  Hz, 1H), 4.25 (dd,  $J = 9.3, 6.6$  Hz, 1H), 3.77 (s, 3H), 3.61 (dt,  $J = 15.9, 7.9$  Hz, 1H), 3.38 – 3.34 (m, 1H), 2.10 – 1.96 (m, 1H), 1.46 (s, 9H), 1.02 (d,  $J = 6.8$  Hz, 3H), 0.98 (d,  $J = 6.7$  Hz, 3H).

Minor amide rotamer:  $^1\text{H}$  NMR (400 MHz,  $\text{CDCl}_3$ )  $\delta$  7.35 – 7.16 (m, 3H), 7.09 – 7.05 (m, 1H), 5.45 (d,  $J = 9.0$  Hz, 1H), 5.25 (dd,  $J = 11.2, 4.7$  Hz, 1H), 5.03 (dd,  $J = 9.1, 2.9$  Hz, 1H), 3.74 (s, 3H), 3.49 (dd,  $J = 16.6, 11.3$  Hz, 1H), 3.14 (dd,  $J = 16.6, 4.6$  Hz, 1H), 2.48 – 2.37 (m, 1H), 1.46 (s, 9H), 1.18 (d,  $J = 6.8$  Hz, 3H), 0.95 (d,  $J = 6.7$  Hz, 3H).

Mixture of amide rotamers:  $^{13}\text{C}$  NMR (126 MHz,  $\text{CDCl}_3$ )  $\delta$  171.59, 171.44, 171.31, 170.86, 156.06, 155.44, 142.27, 140.08, 131.04, 128.81, 128.28, 128.02, 125.90,

124.53, 124.45, 123.99, 117.48, 113.90, 79.65, 79.40, 60.67, 60.38, 57.66, 56.62, 53.25, 52.42, 33.39, 32.70, 31.17, 30.37, 28.33, 19.70, 19.44, 17.53, 15.63.

HRMS (ESI) Calcd for  $C_{20}H_{28}N_2O_5Na$   $[M+Na^+]$ : 399.1890, Found: 399.1891.

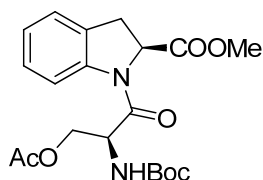

**2g**

According to the general experimental procedure, compound **2g** was obtained as white powder. Two amide rotamers (3:1) exist in NMR spectra.

Major amide rotamer:  $^1H$  NMR (500 MHz,  $CDCl_3$ )  $\delta$  8.22 (d,  $J = 8.1$  Hz, 1H), 7.33 – 7.18 (m, 2H), 7.12 – 7.08 (m, 1H), 5.46 (d,  $J = 8.8$  Hz, 1H), 5.29 (dd,  $J = 10.4, 1.6$  Hz, 1H), 4.81 (dd,  $J = 14.6, 7.3$  Hz, 1H), 4.35 (dd,  $J = 11.1, 5.7$  Hz, 1H), 4.12 – 4.03 (m, 1H), 3.75 (s, 3H), 3.61 (dd,  $J = 16.3, 10.5$  Hz, 1H), 3.40 (d,  $J = 16.3$  Hz, 1H), 2.05 (s, 3H), 1.45 (s, 9H).

Minor amide rotamer:  $^1H$  NMR (500 MHz,  $CDCl_3$ )  $\delta$  7.52 (d,  $J = 8.1$  Hz, 1H), 7.30 – 7.23 (m, 2H), 7.10 – 7.07 (m, 1H), 5.54 (d,  $J = 8.4$  Hz, 1H), 5.42 (d,  $J = 4.7$  Hz, 1H), 5.27 – 5.22 (m, 1H), 4.53 (dd,  $J = 11.3, 4.6$  Hz, 1H), 4.25 (dd,  $J = 11.2, 7.9$  Hz, 1H), 3.72 (s, 3H), 3.50 (dd,  $J = 16.4, 11.3$  Hz, 1H), 3.14 (dd,  $J = 16.7, 3.2$  Hz, 1H), 2.08 (s, 3H), 1.43 (s, 9H).

Mixture of amide rotamers:  $^{13}C$  NMR (126 MHz,  $CDCl_3$ )  $\delta$  171.27, 171.13, 170.83, 170.78, 168.17, 167.77, 155.26, 154.96, 141.89, 129.10, 128.53, 128.06, 125.89, 124.98, 124.58, 117.61, 114.47, 80.20, 80.09, 65.14, 63.85, 60.63, 60.53, 53.33, 52.66, 51.73, 51.58, 33.32, 31.34, 28.27, 20.77.

HRMS (ESI) Calcd for  $C_{20}H_{26}N_2O_7Na$   $[M+Na^+]$ : 429.1632, Found: 429.1623.

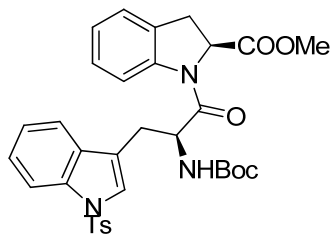

**2h**

According to the general experimental procedure, compound **2h** was obtained as yellow solid. Two amide rotamers (3:1) exist in NMR spectra.

Major amide rotamer:  $^1H$  NMR (400 MHz,  $CDCl_3$ )  $\delta$  8.23 (d,  $J = 8.1$  Hz, 1H), 7.93 (d,  $J = 8.3$  Hz, 1H), 7.70 (d,  $J = 8.3$  Hz, 2H), 7.49 (s, 1H), 7.24 (t,  $J = 7.7$  Hz, 2H), 7.18 (d,  $J = 8.1$  Hz, 2H), 7.11 (d,  $J = 8.1$  Hz, 3H), 7.02 (m, 4H), 5.59 (d,  $J = 8.6$  Hz, 1H), 4.71 (dd,  $J = 14.8, 8.1$  Hz, 1H), 4.14 (d,  $J = 9.5$  Hz, 1H), 3.70 (s, 3H), 3.25 – 3.15 (m, 2H), 2.81 (d,  $J = 14.3$  Hz, 1H), 2.33 (s, 3H), 2.27 – 2.20 (m, 1H), 1.47 (s, 9H).

Minor amide rotamer:  $^1H$  NMR (400 MHz,  $CDCl_3$ )  $\delta$  8.10 (d,  $J = 8.4$  Hz, 1H), 7.90 (d,  $J = 8.4$  Hz, 1H), 7.75 (d,  $J = 8.2$  Hz, 2H), 7.69 – 7.66 (m, 1H), 7.60 (dd,  $J = 13.7, 5.5$

Hz, 2H), 7.48 (s, 1H), 7.24 (t,  $J = 7.7$  Hz, 3H), 7.18 (d,  $J = 8.1$  Hz, 2H), 5.46 – 5.37 (m, 2H), 5.29 (dd,  $J = 11.1, 4.0$  Hz, 1H), 3.82 (s, 3H), 3.16 – 3.10 (m, 3H), 2.24 – 2.20 (m, 1H), 2.19 (s, 3H), 1.40 (s, 9H).

Mixture of amide rotamers:  $^{13}\text{C}$  NMR (126 MHz,  $\text{CDCl}_3$ )  $\delta$  171.76, 170.91, 170.61, 155.16, 154.79, 144.89, 144.64, 143.53, 141.53, 135.02, 134.94, 134.70, 130.36, 129.90, 129.76, 129.04, 129.00, 128.27, 127.84, 127.14, 126.88, 126.73, 125.96, 125.41, 125.31, 124.95, 124.78, 124.70, 124.62, 124.23, 123.35, 123.16, 120.35, 119.68, 119.55, 117.65, 117.26, 116.47, 114.05, 113.61, 113.50, 109.36, 104.93, 80.03, 76.81, 60.52, 60.30, 53.30, 53.15, 52.82, 51.96, 32.28, 31.35, 30.56, 29.73, 28.36, 28.31, 21.61.

HRMS (ESI) Calcd for  $\text{C}_{33}\text{H}_{35}\text{N}_3\text{O}_7\text{SNa}$   $[\text{M}+\text{Na}^+]$ : 640.2088, Found: 640.2087.

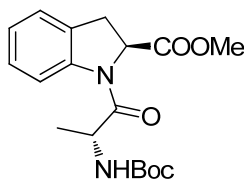

**2i**

According to the general experimental procedure, compound **2i** was obtained as yellow oil. Two amide rotamers (3:1) exist in NMR spectra.

Major amide rotamer:  $^1\text{H}$  NMR (400 MHz,  $\text{CDCl}_3$ )  $\delta$  8.20 (d,  $J = 8.0$  Hz, 1H), 7.28 – 7.12 (m, 2 H), 7.10 – 6.99 (t,  $J = 7.4$  Hz, 1H), 5.68 (d,  $J = 10.2$  Hz, 1 H), 5.30 (d,  $J = 8.3$  Hz, 1 H), 4.47 – 4.34 (m, 1H), 3.75 (s, 3H), 3.61 (dd,  $J = 16.2, 10.9$  Hz, 1 H), 3.32 (d,  $J = 16.3$  Hz, 1 H), 1.41 (m, 3 H), 1.40 (s, 9H).

Minor amide rotamer:  $^1\text{H}$  NMR (400 MHz,  $\text{CDCl}_3$ )  $\delta$  7.38 – 7.35 (m, 1H), 7.28 – 7.12 (m, 2 H), 7.10 – 6.99 (t,  $J = 7.4$  Hz, 1H), 5.68 – 5.67 (m, 1 H), 5.20 – 5.17 (m, 2 H), 3.73 (s, 3H), 3.50 (d,  $J = 8.3$  Hz, 1 H), 3.13 (d,  $J = 15.6$  Hz, 1H), 1.44 (m, 3H), 1.38 (s, 9H)

Mixture of amide rotamers:  $^{13}\text{C}$  NMR (101 MHz,  $\text{CDCl}_3$ )  $\delta$  172.3, 172.1, 171.5, 155.4, 142.3, 131.0, 129.5, 128.3, 127.8, 125.8, 124.5, 124.4, 124.1, 117.9, 114.5, 79.9, 77.5, 77.2, 76.8, 61.1, 60.5, 52.9, 52.5, 49.0, 48.1, 33.3, 31.4, 29.7, 28.3, 18.7, 18.2.

HRMS (ESI) Calcd for  $\text{C}_{18}\text{H}_{24}\text{N}_2\text{O}_5\text{Na}$   $[\text{M}+\text{Na}^+]$ : 371.1577, Found: 371.1590.

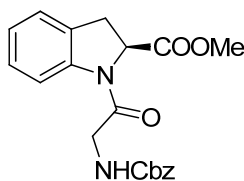

**2j**

According to the general experimental procedure, compound **2j** was obtained as yellow solid. Two amide rotamers (1.5:1) exist in NMR spectra.

Major amide rotamer:  $^1\text{H}$  NMR (400 MHz,  $\text{CDCl}_3$ )  $\delta$  8.21 (d,  $J = 7.7$  Hz, 1H), 7.43 – 7.15 (m, 7H), 7.08 (t,  $J = 7.4$  Hz, 2H), 5.90 (br s, 1H), 5.17 (s, 2H), 4.96 (d,  $J = 9.9$

Hz, 1H), 4.15 (d,  $J = 13.1$  Hz, 1H), 3.95 (d,  $J = 16.3$  Hz, 1H), 3.79 (s, 3H), 3.70 – 3.61 (m, 1H), 3.34 (d,  $J = 16.5$  Hz, 1H),

Minor amide rotamer:  $^1\text{H}$  NMR (400 MHz,  $\text{CDCl}_3$ )  $\delta$  7.43 – 7.15 (m, 10H), 5.79 (br s, 1H), 5.28 – 5.20 (m, 1H), 5.15 (s, 2H), 4.55 – 4.37 (m, 2H), 3.76 (s, 3H), 3.59 – 3.52 (m, 1H), 3.16 (d,  $J = 16.4$  Hz, 1H).

Mixture of amide rotamers:  $^{13}\text{C}$  NMR (101 MHz,  $\text{CDCl}_3$ )  $\delta$  171.3, 167.0, 156.4, 142.1, 139.8, 136.4, 130.8, 129.4, 128.5, 128.4, 128.1, 128.1, 125.9, 124.7, 124.4, 124.2, 117.4, 114.1, 67.0, 60.3, 59.8, 53.2, 52.7, 45.4, 43.9, 33.6, 31.5.

HRMS (ESI) Calcd for  $\text{C}_{20}\text{H}_{20}\text{N}_2\text{O}_5\text{Na}$  [ $\text{M}+\text{Na}^+$ ]: 391.1264, Found: 391.1265.

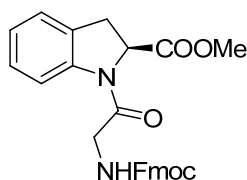

**2k**

According to the general experimental procedure, compound **2k** was obtained as white solid. Two amide rotamers (1.1:1) exist in NMR spectra.

Major amide rotamer:  $^1\text{H}$  NMR (400 MHz,  $\text{CDCl}_3$ )  $\delta$  8.24 (d,  $J = 7.8$  Hz, 1H), 7.79 (d,  $J = 7.5$  Hz, 2H), 7.65 (d,  $J = 7.4$  Hz, 2H), 7.43 (t,  $J = 7.4$  Hz, 2H), 7.35 (t,  $J = 7.4$  Hz, 2H), 7.32 – 7.18 (m, 2H), 7.11 (t,  $J = 7.4$  Hz, 1H), 5.91 (brs, 1H), 4.98 (d,  $J = 10.3$  Hz, 1H), 4.58 – 4.48 (m, 1H), 4.42 (d,  $J = 6.5$  Hz, 2H), 4.27 (t,  $J = 7.2$  Hz, 1H), 4.18 – 4.24 (m, 1H), 3.78 (s, 3H), 3.71 – 3.60 (m, 1H), 3.37 (d,  $J = 16.3$  Hz, 1H),.

Minor amide rotamer:  $^1\text{H}$  NMR (400 MHz,  $\text{CDCl}_3$ )  $\delta$  7.79 (d,  $J = 7.5$  Hz, 2H), 7.65 (d,  $J = 7.4$  Hz, 2H), 7.43 (t,  $J = 7.4$  Hz, 2H), 7.35 (t,  $J = 7.4$  Hz, 2H), 7.32 – 7.18 (m, 3H), 7.11 (t,  $J = 7.4$  Hz, 1H), 5.89 (brs, 1H), 5.26 (d,  $J = 9.2$  Hz, 1H), 4.60 – 4.56 (m, 1H), 4.42 (d,  $J = 6.5$  Hz, 2H), 4.27 (t,  $J = 7.2$  Hz, 1H), 3.97 (d,  $J = 15.0$  Hz, 1H), 3.78 (s, 3H), 3.59 – 3.47 (m, 1H), 3.28 – 3.12 (m, 1H).

Mixture of amide rotamers:  $^{13}\text{C}$  NMR (101 MHz,  $\text{CDCl}_3$ )  $\delta$  171.2, 166.9, 156.3, 143.9, 142.1, 141.3, 139.8, 129.4, 128.2, 127.7, 127.1, 126.0, 125.2, 124.8, 124.5, 120.0, 117.4, 114.0, 67.3, 60.3, 59.8, 53.3, 52.7, 47.1, 45.4, 43.9, 33.7, 31.5, 29.7.

HRMS (ESI) Calcd for  $\text{C}_{27}\text{H}_{24}\text{N}_2\text{O}_5\text{Na}$  [ $\text{M}+\text{Na}^+$ ]: 479.1577, Found: 479.1579.

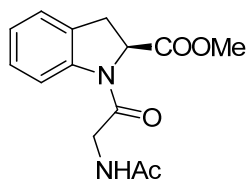

**2l**

According to the general experimental procedure, compound **2l** was obtained as white solid. Two amide rotamers (1.4:1) exist in NMR spectra.

Major amide rotamer:  $^1\text{H}$  NMR (400 MHz,  $\text{CDCl}_3$ )  $\delta$  8.20 (d,  $J = 8.0$  Hz, 1H), 7.39 – 7.26 (m, 2H), 7.10 (t,  $J = 7.5$  Hz, 1H), 6.62 (s, 1H), 4.98 (d,  $J = 10.5$  Hz, 1H), 4.28



(dd,  $J = 17.2, 4.4$  Hz, 1H), 3.94 (d,  $J = 17.2$  Hz, 1H), 3.79 (s, 3H), 3.71 – 3.60 (m, 1H), 3.37 (d,  $J = 16.6$  Hz, 1H), 2.09 (s, 3H).

Minor amide rotamer:  $^1\text{H}$  NMR (400 MHz,  $\text{CDCl}_3$ )  $\delta$  7.39 – 7.26 (m, 3H), 7.10 (t,  $J = 7.5$  Hz, 1H), 6.62 (s, 1H), 5.23 (d,  $J = 8.1$  Hz, 1H), 4.52 – 4.48 (m, 2H), 3.77 (s, 3H), 3.59 – 3.48 (m, 1H), 3.19 (d,  $J = 16.4$  Hz, 1H), 2.09 (s, 3H).

Mixture of amide rotamers:  $^{13}\text{C}$  NMR (101 MHz,  $\text{CDCl}_3$ )  $\delta$  171.1, 170.2, 166.9, 142.0, 128.4, 128.1, 125.9, 124.8, 124.45, 124.4, 117.3, 114.1, 60.3, 59.8, 53.3, 52.7, 44.1, 42.6, 33.6, 31.5, 23.0.

HRMS (ESI) Calcd for  $\text{C}_{14}\text{H}_{16}\text{N}_2\text{O}_4\text{Na}$  [ $\text{M}+\text{Na}^+$ ]: 299.1002, Found: 299.1002.

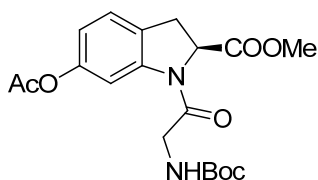

**4a**

According to the general experimental procedure, compound **4a** was obtained as yellow oil. Two amide rotamers (2:1) exist in NMR spectra.

Major amide rotamer:  $^1\text{H}$  NMR (400 MHz,  $\text{CDCl}_3$ )  $\delta$  7.93 (s, 1H), 6.77 (d,  $J = 7.9$  Hz, 1H), 5.51 (br s, 1H), 4.99 (d,  $J = 9.9$  Hz, 1H), 4.07 (d,  $J = 13.2$  Hz, 1H), 3.81 (d,  $J = 17.4$  Hz, 1H), 3.72 (s, 3H), 3.59 – 3.39 (m, 1H), 3.28 (d,  $J = 16.5$  Hz, 1H), 2.27 (s, 3H), 1.46 (s, 9H).

Minor amide rotamer:  $^1\text{H}$  NMR (400 MHz,  $\text{CDCl}_3$ )  $\delta$  7.21 – 7.06 (m, 2H), 6.85 (s, 1H), 5.58 (br s, 1H), 5.20 (d,  $J = 8.4$  Hz, 1H), 4.40 – 4.18 (m, 2H), 3.71 (s, 3H), 3.59 – 3.39 (m, 1H), 3.19 – 3.03 (m, 1H), 2.27 (s, 3H), 1.46 (s, 9H).

Mixture of amide rotamers:  $^{13}\text{C}$  NMR (101 MHz,  $\text{CDCl}_3$ )  $\delta$  171.1, 169.5, 167.6, 167.2, 155.8, 150.4, 143.1, 128.1, 126.0, 125.9, 124.5, 121.6, 117.7, 117.4, 111.4, 108.2, 79.9, 61.0, 60.4, 53.2, 52.7, 45.0, 43.5, 33.2, 31.0, 29.7, 28.3, 21.0.

HRMS (ESI) Calcd for  $\text{C}_{19}\text{H}_{24}\text{N}_2\text{O}_7\text{Na}$  [ $\text{M}+\text{Na}^+$ ]: 415.1476, Found: 415.1470.

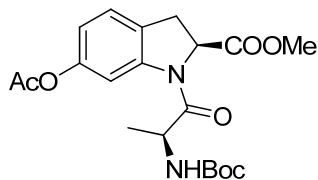

**4b**

According to the general experimental procedure, compound **4b** was obtained as yellow solid. Two amide rotamers (2:1) exist in NMR spectra.

Major amide rotamer:  $^1\text{H}$  NMR (400 MHz,  $\text{CDCl}_3$ )  $\delta$  8.02 (d,  $J = 1.6$  Hz, 1H), 7.20 – 7.14 (m, 1H), 6.86 – 6.80 (m, 1H), 5.42 (d,  $J = 8.3$  Hz, 1H), 5.00 (dd,  $J = 10.6, 1.7$  Hz, 1H), 4.52 – 4.40 (m, 1H), 3.78 (s, 3H), 3.60 (dd,  $J = 16.4, 10.8$  Hz, 1H), 3.36 (d,  $J = 16.3$  Hz, 1H), 2.30 (s, 3H), 1.46 (s, 9H), 1.40 (d,  $J = 6.8$  Hz, 3H).

Minor amide rotamer:  $^1\text{H}$  NMR (400 MHz,  $\text{CDCl}_3$ )  $\delta$  7.24 – 7.19 (m, 1H), 6.93 (s, 1H), 6.86 – 6.80 (m, 1H), 5.52 (d,  $J = 7.4$  Hz, 1H), 5.28 (dd,  $J = 11.1, 3.8$  Hz, 1H),

4.97 – 4.91 (m, 1H), 3.76 (s, 3H), 3.48 (dd,  $J = 16.5, 11.3$  Hz, 1H), 3.12 (dd,  $J = 16.6, 3.5$  Hz, 1H), 2.34 (s, 3H), 1.54 (d,  $J = 6.9$  Hz, 3H), 1.46 (s, 9H).

Mixture of amide rotamers:  $^{13}\text{C}$  NMR (126 MHz,  $\text{CDCl}_3$ )  $\delta$  171.98, 171.56, 171.15, 169.56, 169.29, 155.14, 154.75, 150.70, 150.43, 143.26, 140.75, 128.31, 126.14, 125.97, 124.56, 117.79, 117.22, 111.66, 108.27, 79.86, 79.70, 61.06, 60.39, 53.33, 52.57, 48.61, 33.10, 31.58, 30.73, 29.70, 28.35, 22.65, 21.19, 21.03, 19.82, 18.64, 14.20, 14.11.

HRMS (ESI) Calcd for  $\text{C}_{20}\text{H}_{26}\text{N}_2\text{O}_7\text{Na}$   $[\text{M}+\text{Na}^+]$ : 429.1632, Found: 429.1631.

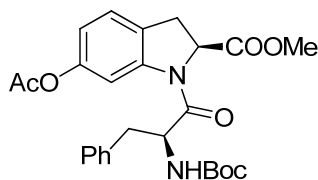

**4c**

According to the general experimental procedure, compound **4c** was obtained as yellow solid. Two amide rotamers ( $>10:1$ ) exist in NMR spectra.

Major amide rotamer:  $^1\text{H}$  NMR (400 MHz,  $\text{CDCl}_3$ )  $\delta$  8.02 (d,  $J = 1.9$  Hz, 1H), 7.28 – 7.17 (m, 5H), 7.05 (d,  $J = 8.0$  Hz, 1H), 6.84 – 6.75 (m, 1H), 5.53 (d,  $J = 8.7$  Hz, 1H), 4.59 (td,  $J = 9.4, 5.2$  Hz, 1H), 4.16 (d,  $J = 9.2$  Hz, 1H), 3.70 (s, 3H), 3.20 – 2.94 (m, 3H), 2.81 (dd,  $J = 16.2, 10.5$  Hz, 1H), 2.29 (s, 3H), 1.43 (s, 9H).

$^{13}\text{C}$  NMR (101 MHz,  $\text{CDCl}_3$ )  $\delta$  171.03, 170.95, 169.53, 154.69, 150.21, 142.43, 136.07, 129.40, 128.74, 127.15, 126.50, 124.40, 117.84, 111.67, 79.79, 61.01, 54.57, 53.21, 41.54, 32.38, 28.34, 21.06.

HRMS (ESI) Calcd for  $\text{C}_{26}\text{H}_{30}\text{N}_2\text{O}_7\text{Na}$   $[\text{M}+\text{Na}^+]$ : 505.1945, Found: 505.1948.

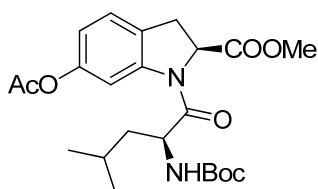

**4d**

According to the general experimental procedure, compound **4d** was obtained as yellow solid. Two amide rotamers (3:1) exist in NMR spectra.

Major amide rotamer:  $^1\text{H}$  NMR (500 MHz,  $\text{CDCl}_3$ )  $\delta$  8.00 (d,  $J = 1.6$  Hz, 1H), 7.14 (t,  $J = 10.6$  Hz, 1H), 6.79 (dd,  $J = 8.0, 2.1$  Hz, 1H), 5.22 (dd,  $J = 13.8, 6.9$  Hz, 1H), 5.03 – 4.94 (m, 1H), 4.43 (td,  $J = 9.8, 3.6$  Hz, 1H), 3.77 (s, 3H), 3.66 – 3.55 (m, 1H), 3.32 (d,  $J = 16.4$  Hz, 1H), 2.28 (s, 3H), 1.79 – 1.70 (m, 1H), 1.60 – 1.52 (m, 2H), 1.43 (s, 9H), 1.01 (d,  $J = 6.5$  Hz, 3H), 0.95 (d,  $J = 6.7$  Hz, 3H).

Minor amide rotamer:  $^1\text{H}$  NMR (500 MHz,  $\text{CDCl}_3$ )  $\delta$  7.17 (d,  $J = 9.2$  Hz, 1H), 7.03 (d,  $J = 20.4$  Hz, 1H), 6.79 (dd,  $J = 8.0, 2.1$  Hz, 1H), 5.29 (d,  $J = 8.7$  Hz, 1H), 5.03 – 4.94 (m, 1H), 4.43 (td,  $J = 9.8, 3.6$  Hz, 1H), 3.73 (s, 3H), 3.45 (dd,  $J = 16.5, 11.3$  Hz, 1H), 3.17 – 3.05 (m, 1H), 2.28 (s, 3H), 1.90 (m, 1H), 1.59 (m, 1H), 1.43 (s, 9H), 1.39 (m, 1H), 1.12 (d,  $J = 6.5$  Hz, 3H), 0.98 (d,  $J = 6.7$  Hz, 3H).

Mixture of amide rotamers:  $^{13}\text{C}$  NMR (126 MHz,  $\text{CDCl}_3$ )  $\delta$  172.33, 171.90, 171.26, 171.14, 169.54, 169.21, 155.65, 155.15, 150.68, 150.42, 143.34, 140.91, 128.28, 126.14, 125.94, 124.53, 117.69, 117.04, 111.56, 108.40, 79.76, 79.52, 61.26, 61.05, 53.35, 52.51, 51.45, 51.18, 43.62, 40.93, 33.16, 31.58, 30.74, 29.69, 28.31, 24.80, 24.64, 23.57, 23.40, 22.64, 21.90, 21.35, 21.01, 14.11.  
 HRMS (ESI) Calcd for  $\text{C}_{23}\text{H}_{32}\text{N}_2\text{O}_7\text{Na}$   $[\text{M}+\text{Na}^+]$ : 471.2102, Found: 471.2120.

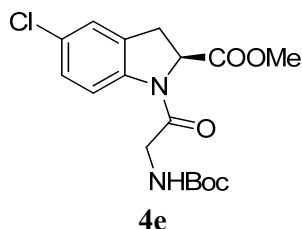

According to the general experimental procedure, compound **4e** was obtained as yellow oil. Two amide rotamers (2:1) exist in NMR spectra.

Major amide rotamer:  $^1\text{H}$  NMR (500 MHz,  $\text{CDCl}_3$ )  $\delta$  8.12 (d,  $J$  = 8.4 Hz, 1H), 7.25 – 7.13 (m, 2H), 5.46 (s, 1H), 4.97 (d,  $J$  = 10.0 Hz, 1H), 4.19 – 4.06 (m, 1H), 3.81 (d,  $J$  = 18.8 Hz, 1H), 3.78 (s, 3H), 3.68 – 3.55 (m, 1H), 3.30 (d,  $J$  = 16.5 Hz, 1H), 1.46 (s, 9H).

Minor amide rotamer:  $^1\text{H}$  NMR (500 MHz,  $\text{CDCl}_3$ )  $\delta$  7.07 (s, 1H), 7.25 – 7.13 (m, 2H), 5.53 (s, 1H), 5.21 (s, 1H), 4.43 – 4.25 (m, 2H), 3.75 (s, 3H), 3.50 (d,  $J$  = 14.1 Hz, 1H), 3.13 (d,  $J$  = 15.5 Hz, 1H), 1.46 (s, 9H).

Mixture of amide rotamers:  $^{13}\text{C}$  NMR (101 MHz,  $\text{CDCl}_3$ )  $\delta$  171.0, 167.4, 155.8, 140.9, 130.4, 129.4, 128.0, 126.0, 124.6, 118.1, 114.8, 79.9, 77.1, 60.7, 59.9, 53.3, 52.7, 45.0, 43.4, 33.4, 31.3, 29.7, 28.3.

HRMS (ESI) Calcd for  $\text{C}_{17}\text{H}_{21}\text{ClN}_2\text{O}_5\text{Na}$   $[\text{M}+\text{Na}^+]$ : 391.1031, Found: 391.1027.

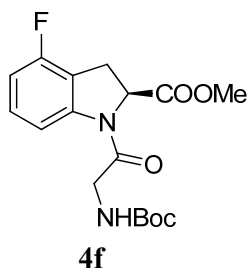

According to the general experimental procedure, compound **4f** was obtained as yellow solid. Two amide rotamers (1.4:1) exist in NMR spectra.

Major amide rotamer:  $^1\text{H}$  NMR (500 MHz,  $\text{CDCl}_3$ )  $\delta$  7.98 (d,  $J$  = 6.6 Hz, 1H), 7.22 (d,  $J$  = 8.1 Hz, 1H), 6.78 (d,  $J$  = 8.4 Hz, 1H), 5.46 (br s, 1H), 5.01 (d,  $J$  = 8.5 Hz, 1H), 4.11 (d,  $J$  = 14.1 Hz, 1H), 3.85 – 3.80 (m, 1H), 3.79 (s, 3H), 3.70 – 3.54 (m, 1H), 3.41 (d,  $J$  = 16.4 Hz, 1H), 1.46 (s, 9H).

Minor amide rotamer:  $^1\text{H}$  NMR (500 MHz,  $\text{CDCl}_3$ )  $\delta$  7.22 (d,  $J$  = 8.1 Hz, 1H), 6.98 (d,  $J$  = 27.8 Hz, 1H), 6.78 (d,  $J$  = 8.4 Hz, 1H), 5.50 (d,  $J$  = 16.0 Hz, 1H), 5.24 (s, 1H), 4.37 (d,  $J$  = 24.2 Hz, 2H), 3.76 (s, 3H), 3.46 (d,  $J$  = 12.3 Hz, 1H), 3.28 – 3.11 (m, 1H), 1.46 (s, 9H).

Mixture of amide rotamers:  $^{13}\text{C}$  NMR (101 MHz,  $\text{CDCl}_3$ )  $\delta$  170.9, 167.4, 159.8, 157.4, 155.8, 144.5, 142.3, 130.1, 128.9, 117.4, 114.8, 113.2, 111.5, 111.3, 109.8, 80.0, 60.7, 60.1, 53.3, 52.7, 45.1, 43.6, 30.1, 29.7, 28.3, 28.1, 27.8.

HRMS (ESI) Calcd for  $\text{C}_{17}\text{H}_{21}\text{FN}_2\text{O}_5\text{Na}$   $[\text{M}+\text{Na}^+]$ : 375.1327, Found: 375.1325.

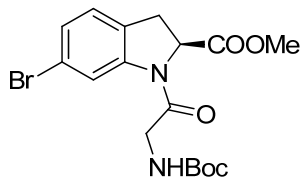

**4g**

According to the general experimental procedure, compound **4g** was obtained as yellow solid. Two amide rotamers (3:1) exist in NMR spectra.

Major amide rotamer:  $^1\text{H}$  NMR (500 MHz,  $\text{CDCl}_3$ )  $\delta$  8.39 (s, 1H), 7.19 – 7.16 (m, 1H), 7.03 (d,  $J$  = 7.4 Hz, 1H), 5.45 (br s, 1H), 4.97 (d,  $J$  = 9.9 Hz, 1H), 4.19 – 4.06 (m, 1H), 3.81 (d,  $J$  = 12.5 Hz, 1H), 3.78 (s, 3H), 3.57 (dd,  $J$  = 33.9, 17.9 Hz, 1H), 3.27 (d,  $J$  = 16.3 Hz, 1H), 1.46 (s, 9H).

Minor amide rotamer:  $^1\text{H}$  NMR (500 MHz,  $\text{CDCl}_3$ )  $\delta$  7.28 – 7.20 (m, 2H), 7.06 (s, 1H), 5.48 (br s, 1H), 5.21 (s, 1H), 4.34 – 4.26 (m, 2H), 3.74 (s, 3H), 3.46 – 3.43 (m, 1H), 3.08 (d,  $J$  = 14.0 Hz, 1H), 1.47 (s, 9H).

Mixture of amide rotamers:  $^{13}\text{C}$  NMR (101 MHz,  $\text{CDCl}_3$ )  $\delta$  171.0, 167.6, 155.8, 143.4, 127.5, 127.4, 127.1, 126.9, 125.5, 121.4, 120.4, 80.0, 77.5, 60.7, 60.1, 53.3, 52.7, 45.0, 43.5, 33.3, 31.1, 29.7, 28.3.

HRMS (ESI) Calcd for  $\text{C}_{17}\text{H}_{21}\text{BrN}_2\text{O}_5\text{Na}$   $[\text{M}+\text{Na}^+]$ : 435.0526, Found: 435.0529.

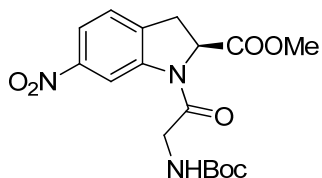

**4h**

According to the general experimental procedure, compound **4h** was obtained as yellow solid. Two amide rotamers (>20:1) exist in NMR spectra.

Major amide rotamer:  $^1\text{H}$  NMR (400 MHz,  $\text{CDCl}_3$ )  $\delta$  8.95 (s, 1H), 7.93 (dd,  $J$  = 8.2, 1.7 Hz, 1H), 7.41 – 7.26 (m, 2H), 5.51 (s, 1H), 5.14 (d,  $J$  = 9.7 Hz, 1H), 4.25 – 4.10 (m, 1H), 3.80 (s, 3H), 3.72 (m, 2H), 3.41 (d,  $J$  = 17.6 Hz, 1H), 1.46 (s, 9H).

$^{13}\text{C}$  NMR (101 MHz,  $\text{CDCl}_3$ )  $\delta$  170.7, 168.1, 155.9, 148.1, 143.1, 135.8, 124.6, 120.0, 112.3, 80.2, 60.26, 53.4, 43.5, 33.6, 28.3.

HRMS (ESI) Calcd for  $\text{C}_{17}\text{H}_{21}\text{N}_3\text{O}_7\text{Na}$   $[\text{M}+\text{Na}^+]$ : 402.1272, Found: 402.1277.

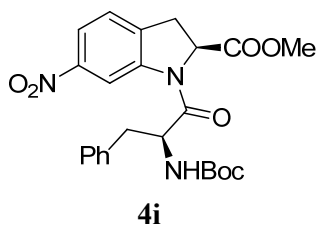

According to the general experimental procedure, compound **4i** was obtained as yellow solid. **4i** contains two amide rotamers (>20:1).

Major amide rotamer:  $^1\text{H}$  NMR (400 MHz,  $\text{CDCl}_3$ )  $\delta$  9.09 (d,  $J = 2.0$  Hz, 1H), 7.96 (dd,  $J = 8.2, 1.9$  Hz, 1H), 7.27 – 7.16 (m, 6H), 5.54 (d,  $J = 8.8$  Hz, 1H), 4.65 (td,  $J = 9.7, 5.2$  Hz, 1H), 4.20 (d,  $J = 9.3$  Hz, 1H), 3.71 (s, 3H), 3.19 – 2.97 (m, 3H), 2.83 (dd,  $J = 17.1, 10.7$  Hz, 1H), 1.47 (s, 9H).

$^{13}\text{C}$  NMR (101 MHz,  $\text{CDCl}_3$ )  $\delta$  171.48, 170.39, 154.70, 148.15, 142.40, 136.27, 135.96, 129.42, 128.78, 127.29, 124.43, 120.18, 112.66, 80.02, 60.79, 54.53, 53.37, 41.55, 32.72, 28.33.

HRMS (ESI) Calcd for  $\text{C}_{24}\text{H}_{27}\text{N}_3\text{O}_7\text{Na}$  [ $\text{M}+\text{Na}^+$ ]: 492.1741, Found: 492.1752.

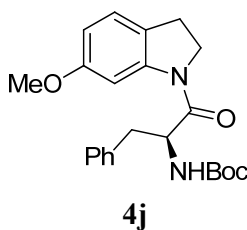

According to the general experimental procedure, compound **4j** was obtained as yellow solid.

$^1\text{H}$  NMR (400 MHz,  $\text{CDCl}_3$ )  $\delta$  7.94 (d,  $J = 2.2$  Hz, 1H), 7.28 – 7.20 (m, 5H), 7.02 (d,  $J = 8.2$  Hz, 1H), 6.61 (dd,  $J = 8.2, 2.4$  Hz, 1H), 5.45 (d,  $J = 8.8$  Hz, 1H), 4.76 (dd,  $J = 14.8, 8.4$  Hz, 1H), 4.21 – 4.09 (m, 1H), 3.86 (s, 3H), 3.42 (td,  $J = 10.2, 6.3$  Hz, 1H), 3.19 – 2.94 (m, 3H), 2.86 – 2.72 (m, 1H), 1.44 (s, 9H).

$^{13}\text{C}$  NMR (101 MHz,  $\text{CDCl}_3$ )  $\delta$  170.2, 159.3, 155.2, 143.4, 136.2, 129.4, 128.5, 127.0, 124.7, 123.6, 110.7, 103.4, 79.9, 55.6, 54.2, 48.7, 40.0, 28.3, 27.2.

HRMS (ESI) Calcd for  $\text{C}_{23}\text{H}_{28}\text{N}_2\text{O}_4\text{Na}$  [ $\text{M}+\text{Na}^+$ ]: 419.1941, Found: 419.1938.

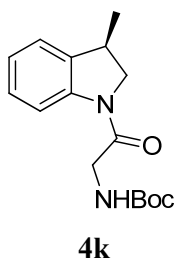

According to the general experimental procedure, compound **4k** was obtained as yellow oil.

$^1\text{H}$  NMR (400 MHz,  $\text{CDCl}_3$ )  $\delta$  8.18 (d,  $J = 8.0$  Hz, 1H), 7.26 – 7.17 (m, 2H), 7.08 (t,  $J = 7.4$  Hz, 1H), 5.59 (s, 1H), 4.24 – 4.10 (m, 1H), 4.04 (d,  $J = 4.3$  Hz, 2H), 3.62 – 3.47 (m, 2H), 1.48 (s, 9H), 1.36 (d,  $J = 6.4$  Hz, 3H).

$^{13}\text{C}$  NMR (101 MHz,  $\text{CDCl}_3$ )  $\delta$  166.5, 155.9, 142.0, 136.2, 127.8, 124.3, 123.5, 116.8, 79.8, 54.6, 43.9, 35.0, 28.4, 20.3.

HRMS (ESI) Calcd for  $\text{C}_{16}\text{H}_{22}\text{N}_2\text{O}_3\text{Na}$  [ $\text{M} + \text{Na}^+$ ]: 313.1523, Found: 313.1518.

$^1\text{H}$  and  $^{13}\text{C}$  NMR spectra of **2a** (two amide rotamers, 1.6:1)

2-48-2  
2-48-2 CDCl<sub>3</sub> H

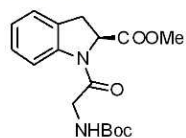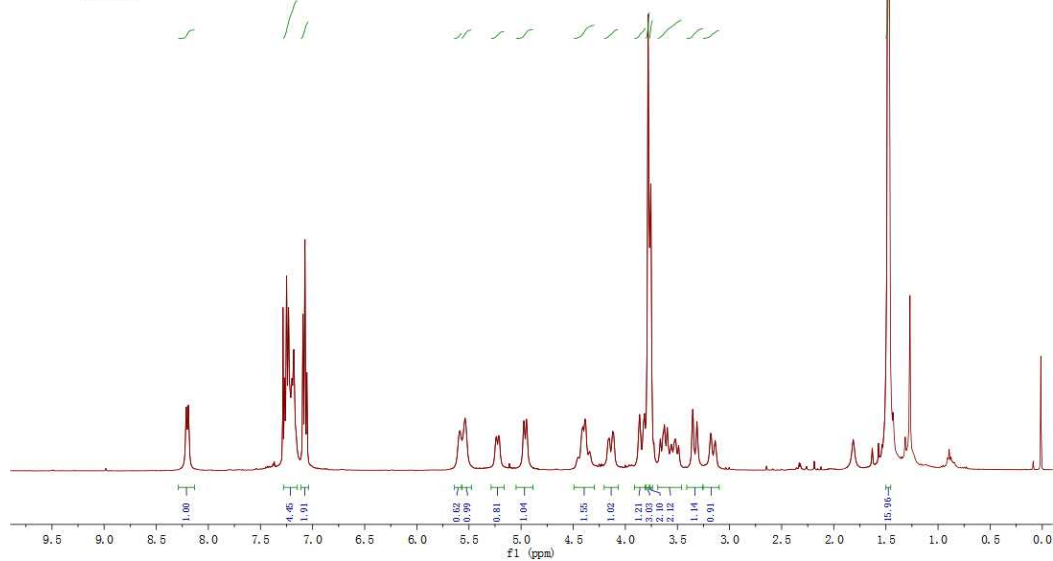

2-48-1  
2-48-1

CDCl<sub>3</sub>

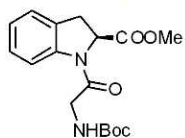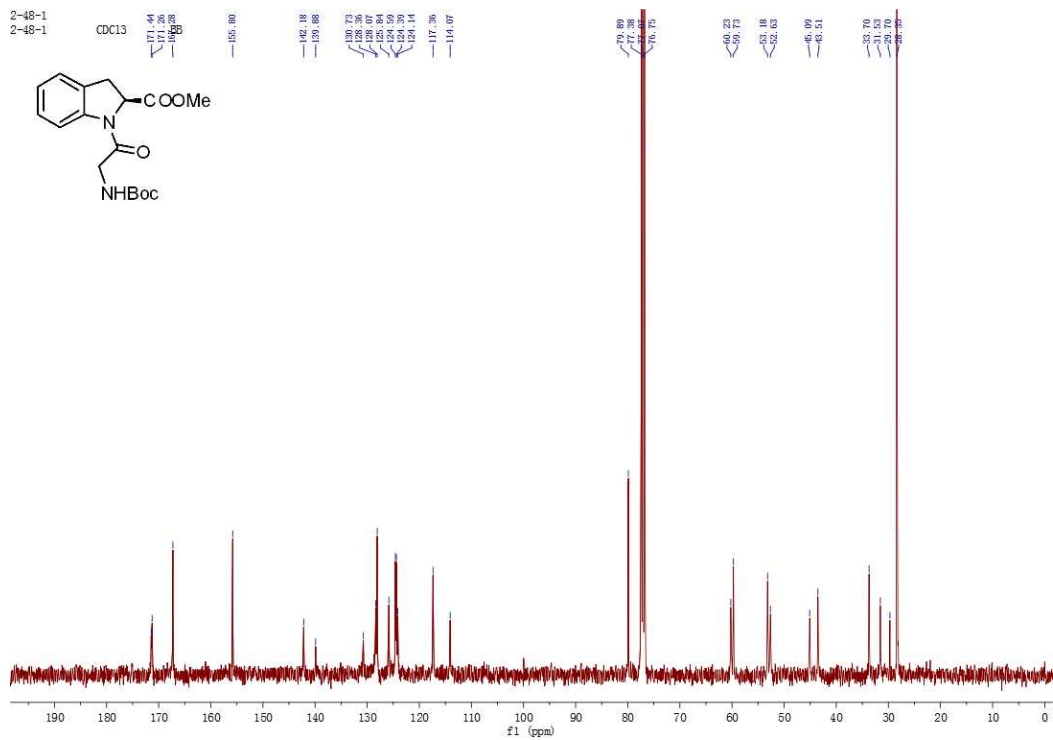

$^1\text{H}$  and  $^{13}\text{C}$  NMR spectra of **2b** (two amide rotamers, 1.3:1)

C7-2-57-1-1  
C7-2-57-1-1

CDCl<sub>3</sub> 1H

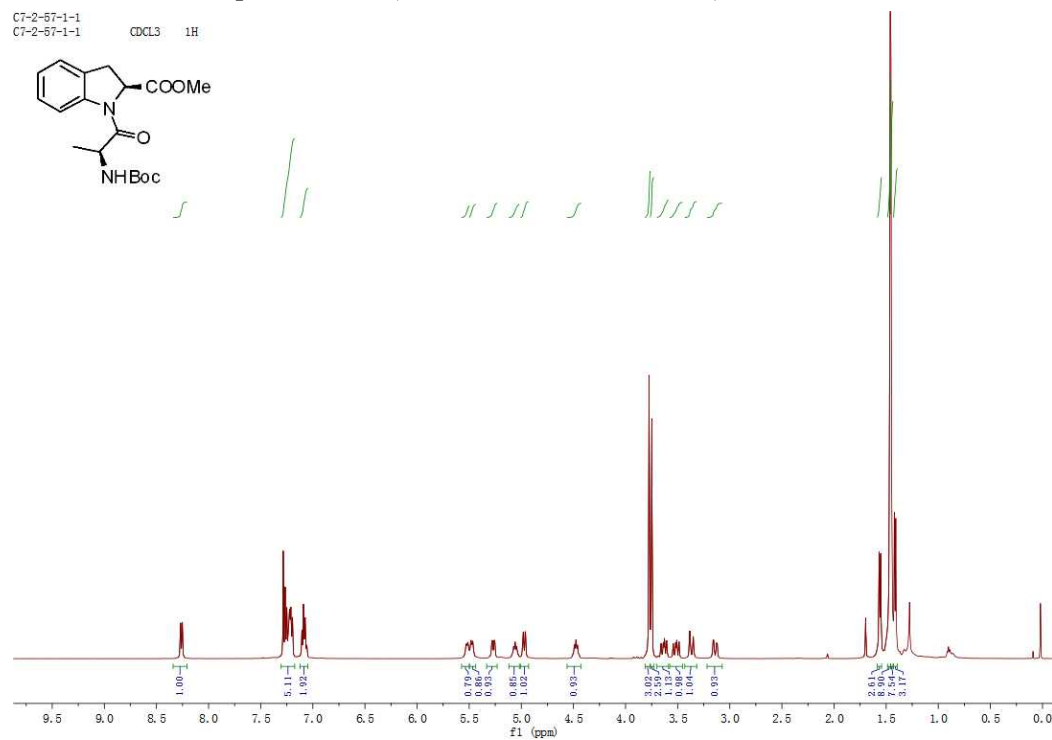

2-57-1  
2-57-1

CDCl<sub>3</sub> 13C

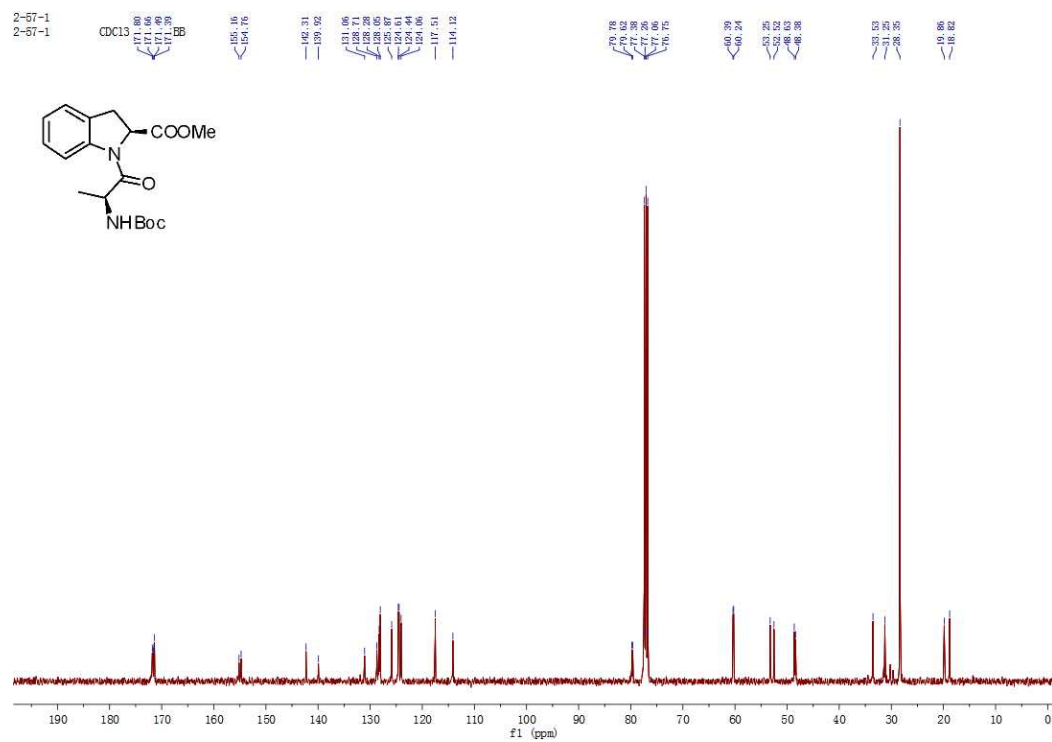



<sup>1</sup>H and <sup>13</sup>C NMR spectra of **2c** (two amide rotamers, 4.5:1)

2-200-1  
2-200-1 CDC13 H

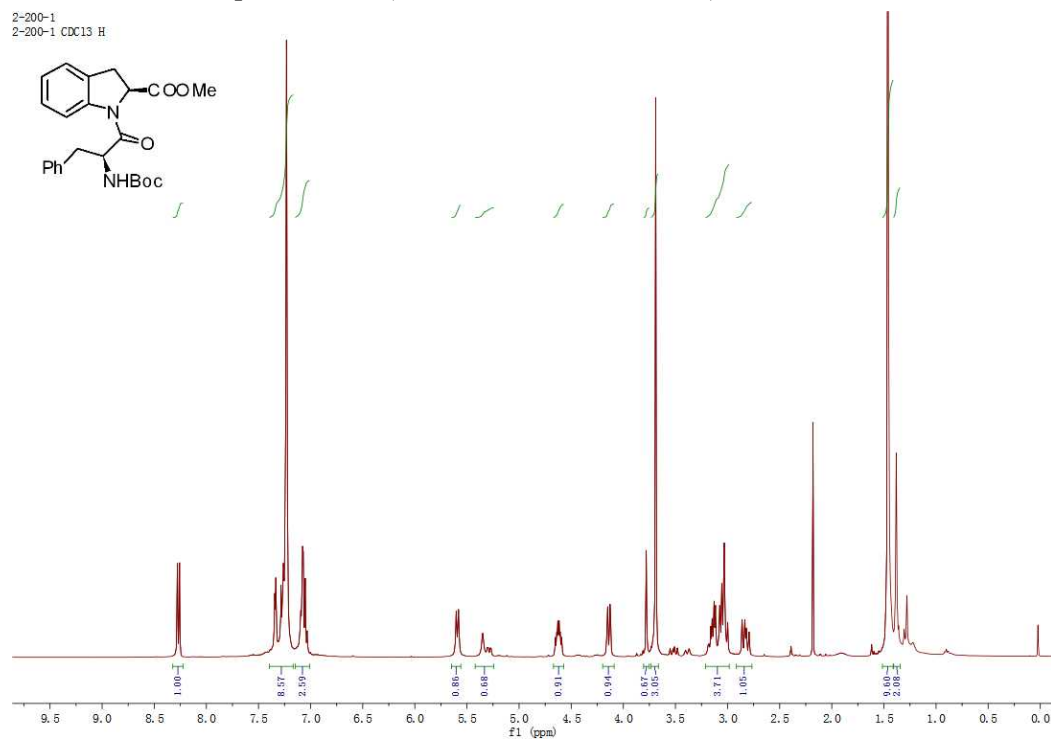

2-200-1  
2-200-1

CDCl<sub>3</sub>

BB

154.71

141.53

136.20

129.74

129.43

128.90

128.60

127.84

124.64

79.69

77.46

77.00

76.78

59.54

59.35

54.98

53.13

52.55

41.56

38.23

32.69

32.36

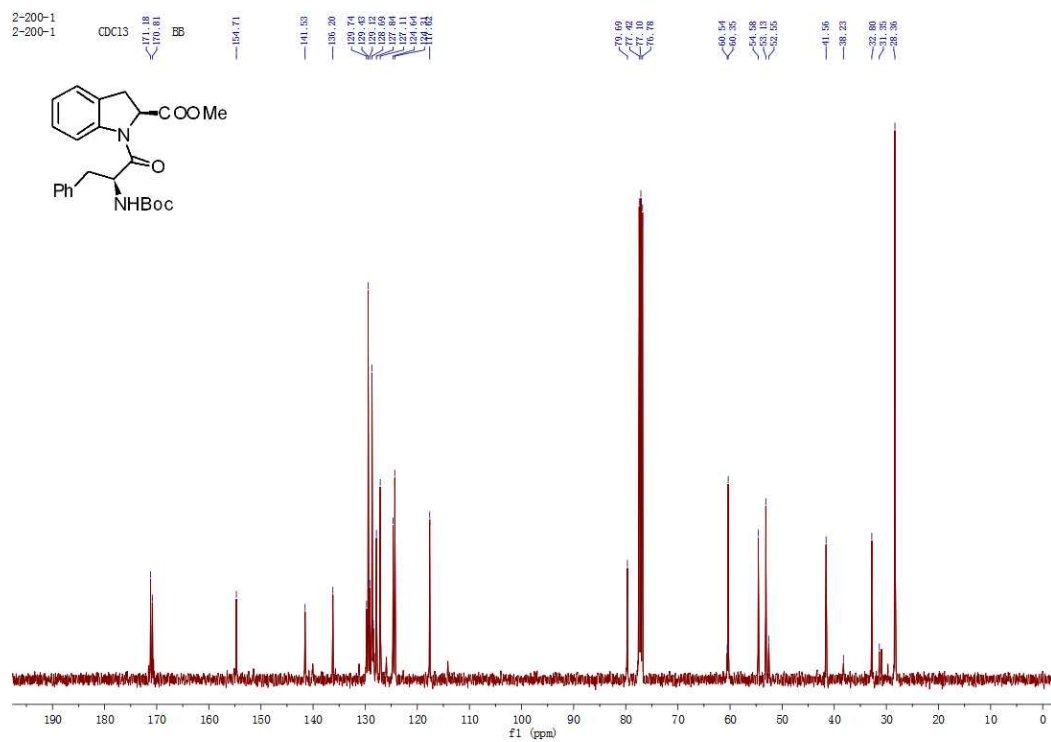

$^1\text{H}$  and  $^{13}\text{C}$  NMR spectra of **2d** (two amide rotamers, 1.7:1)

2-214-1  
2-214-1 CDCl<sub>3</sub> H

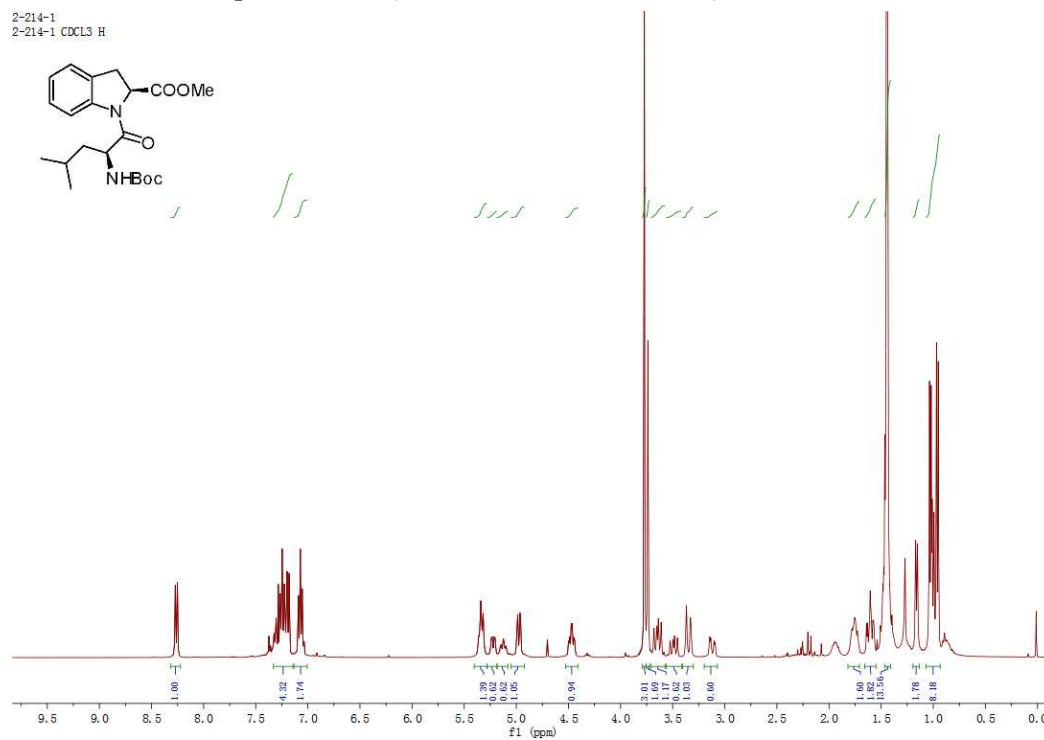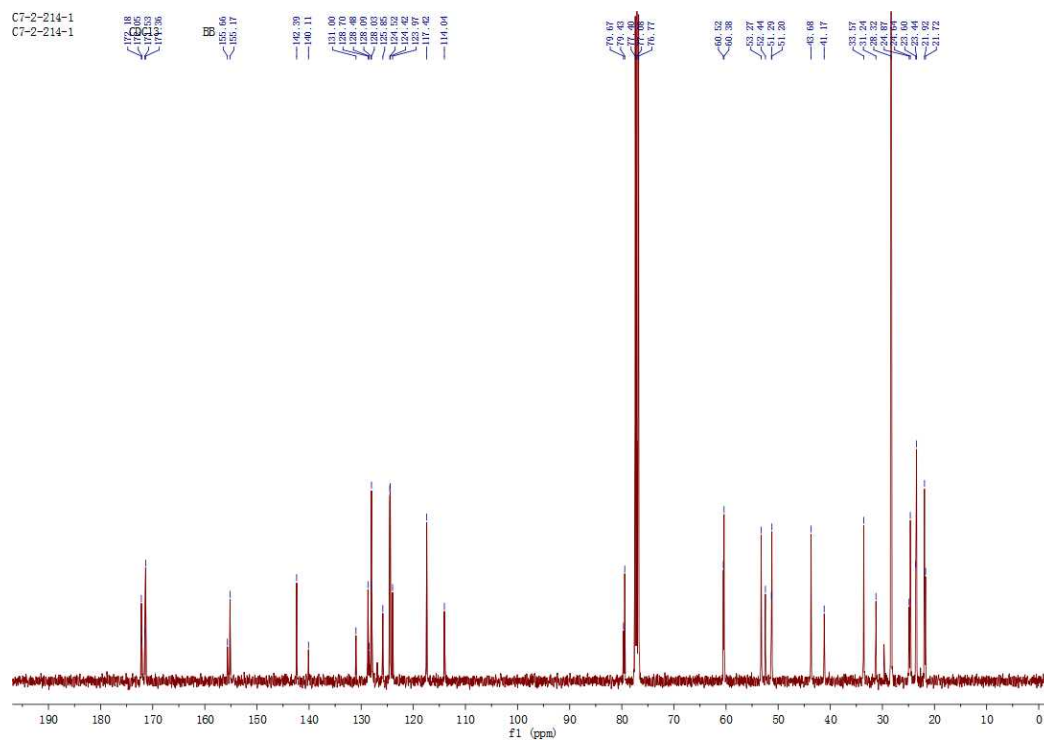

$^1\text{H}$  and  $^{13}\text{C}$  NMR spectra of **2e** (two amide rotamers, 1.3:1)

2-63-1  
2-63-1 CDCl<sub>3</sub> H

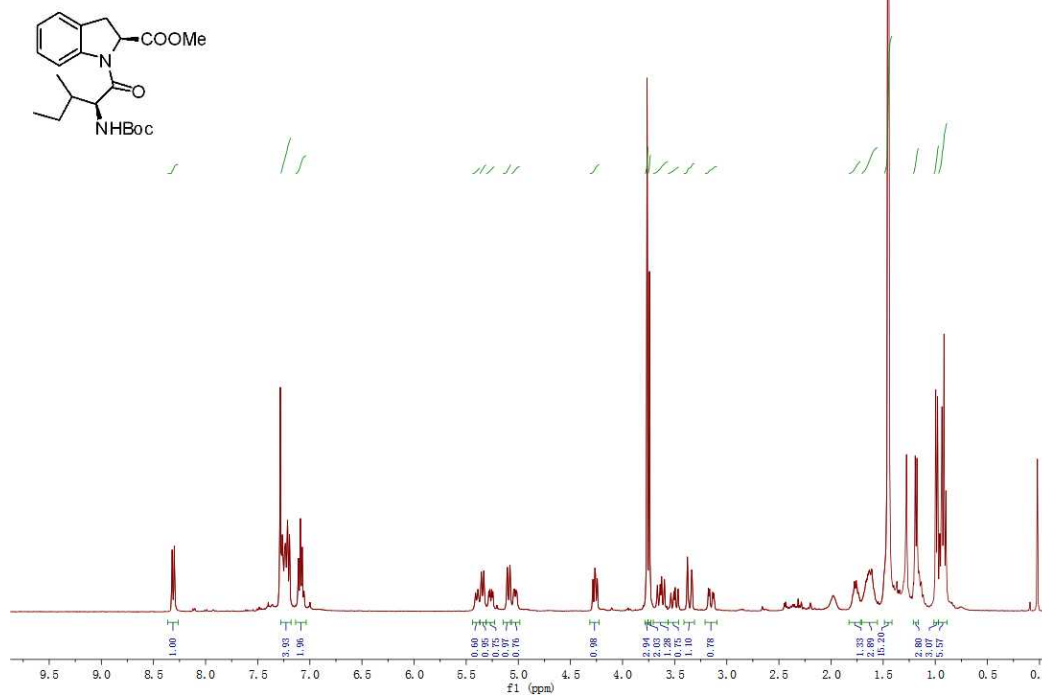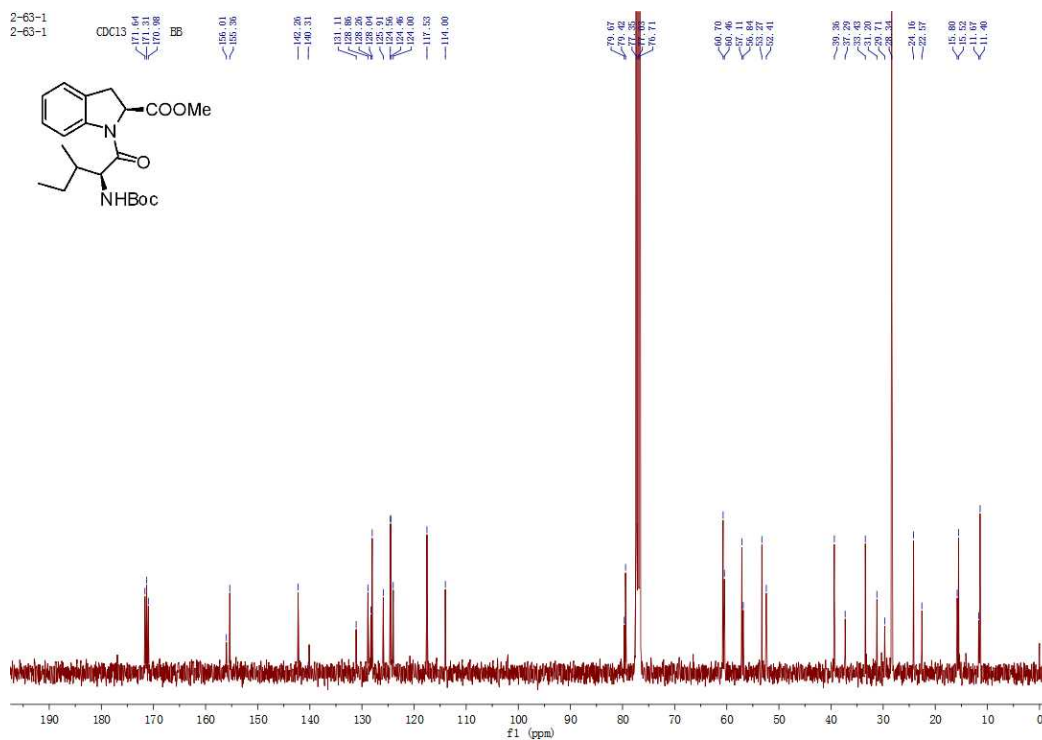

C7-4-307  
C7-4-307 CDC13 1H

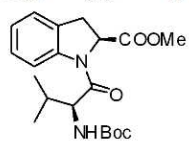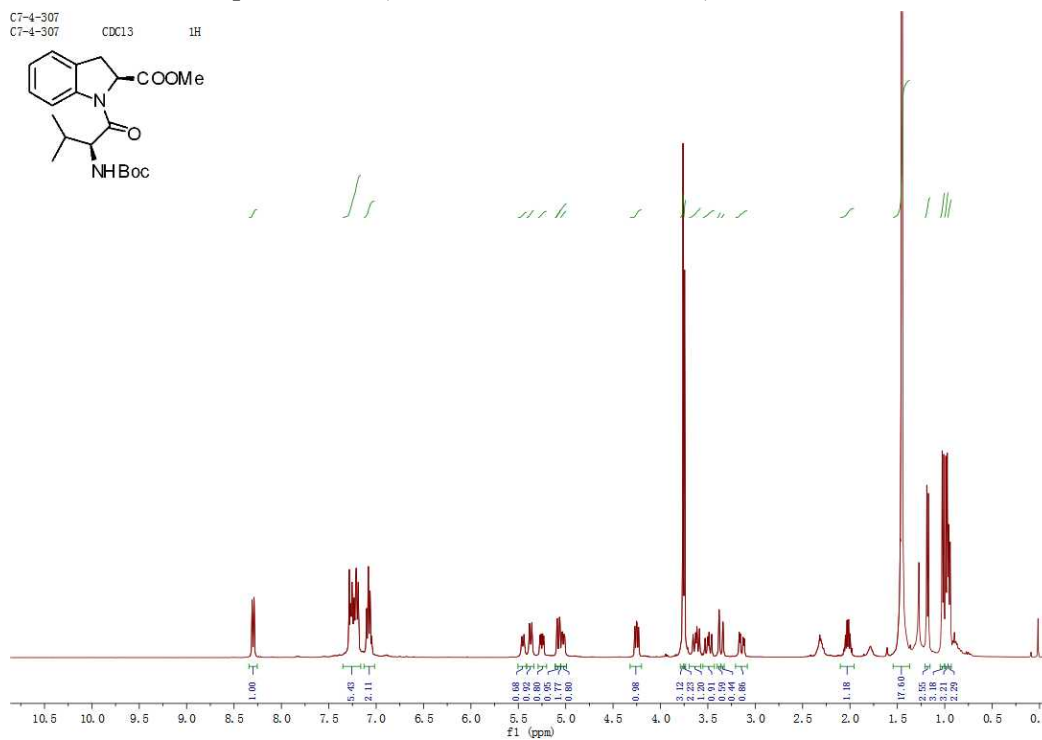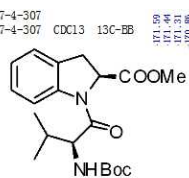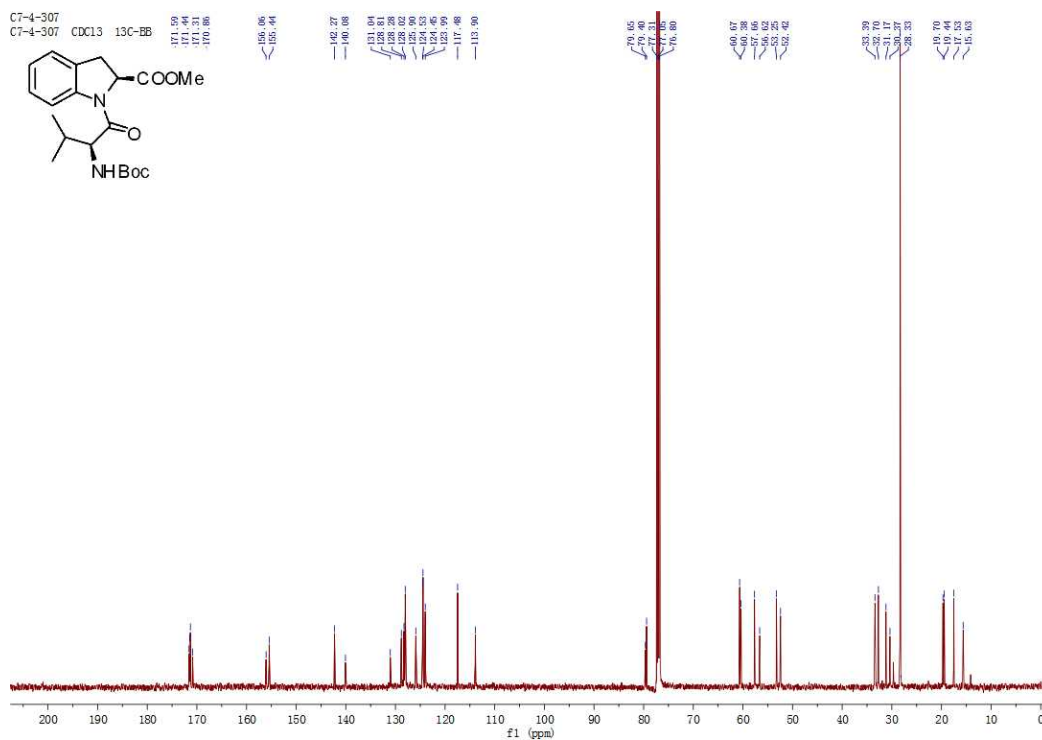

## C7-4-444

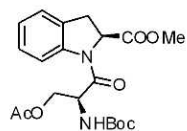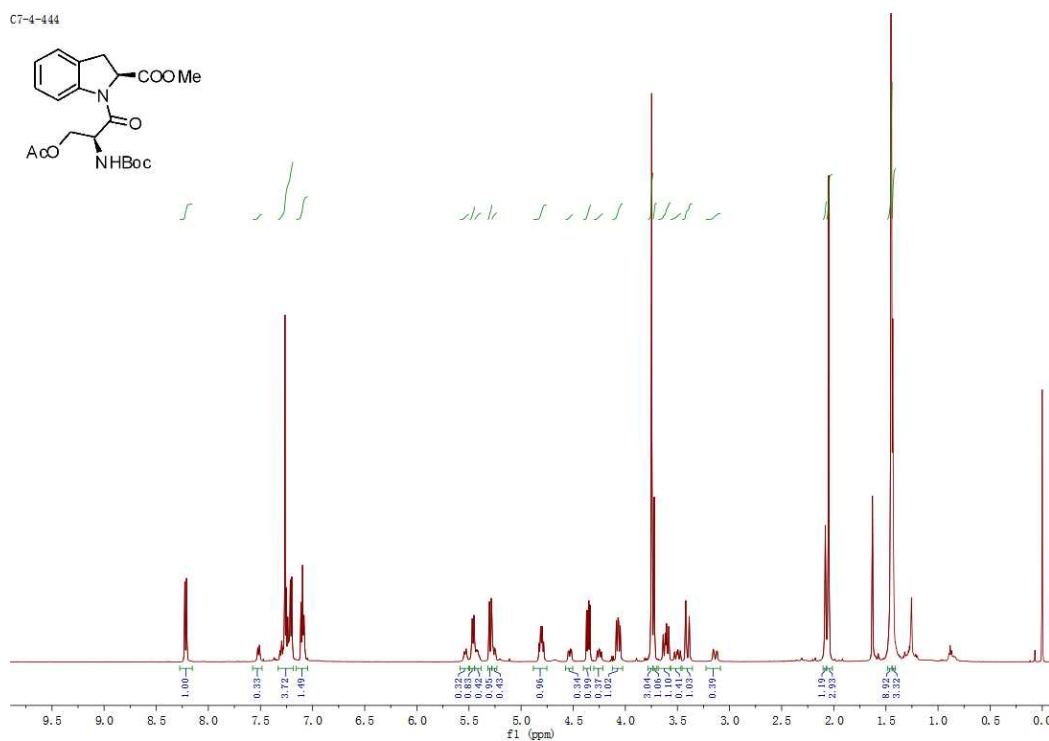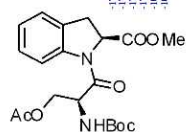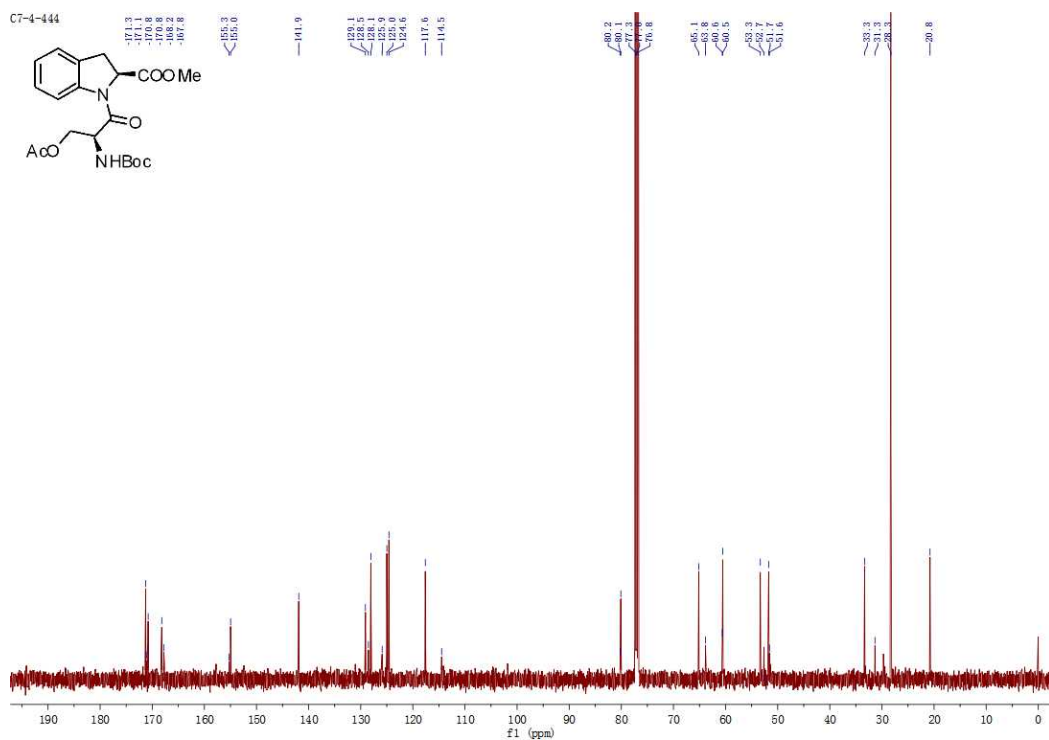

4-239  
4-239 CDC13 1H

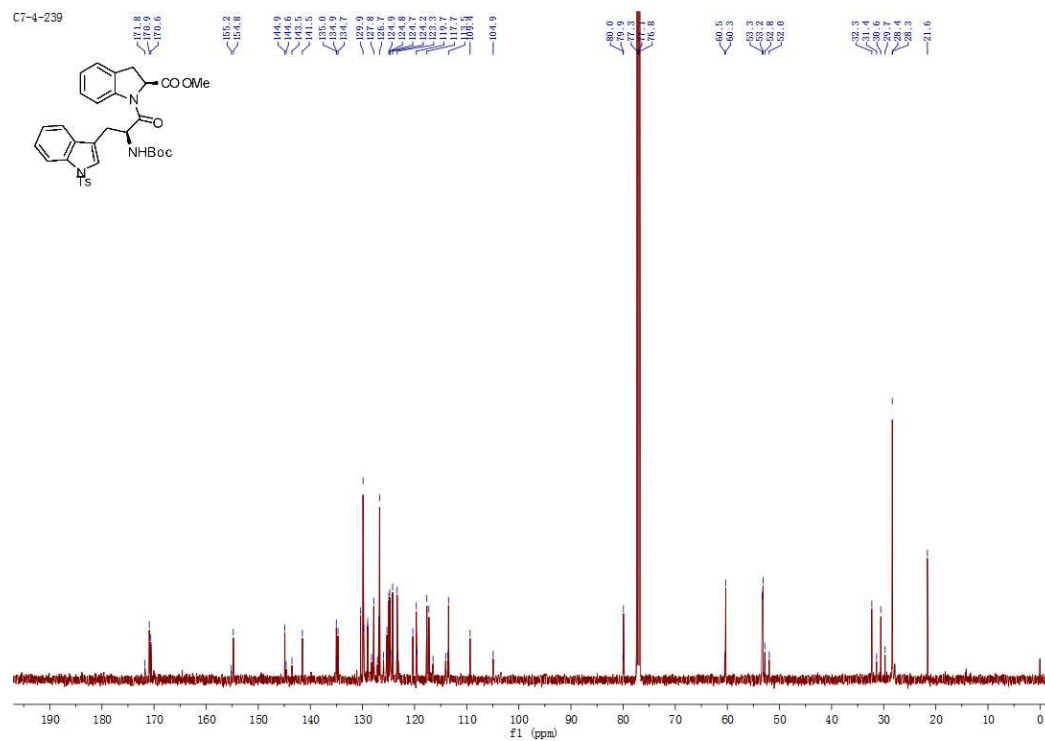

$^1\text{H}$  and  $^{13}\text{C}$  NMR spectra of **2i** (two amide rotamers, 3:1)

C7-2-215-1-1  
C7-2-215-1-1

CDCl<sub>3</sub>  $^1\text{H}$

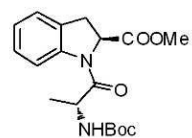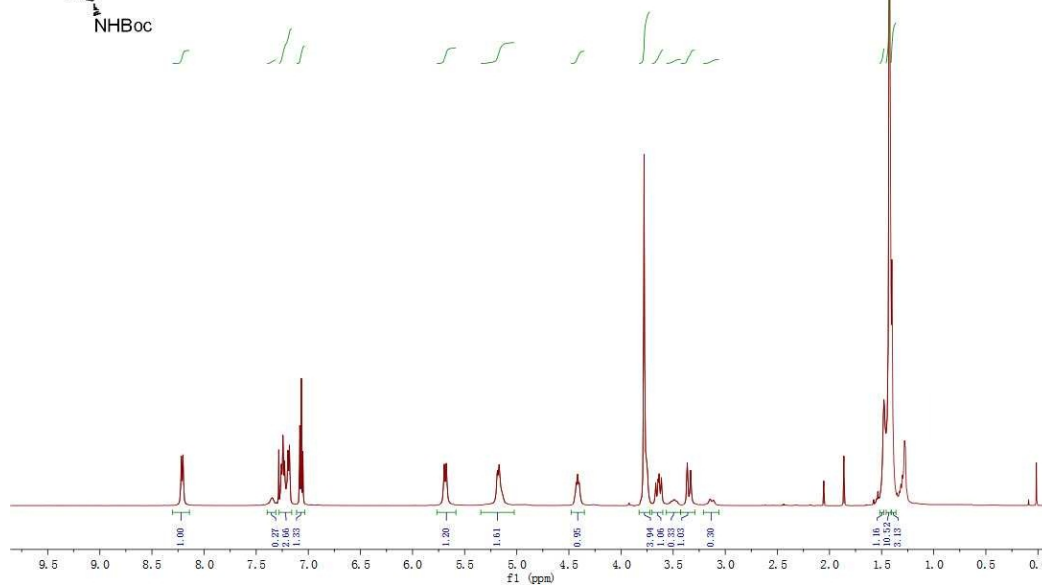

C7-2-215-1  
C7-2-215-1

CDCl<sub>3</sub>

$^{13}\text{C}$

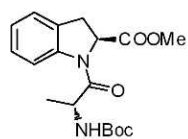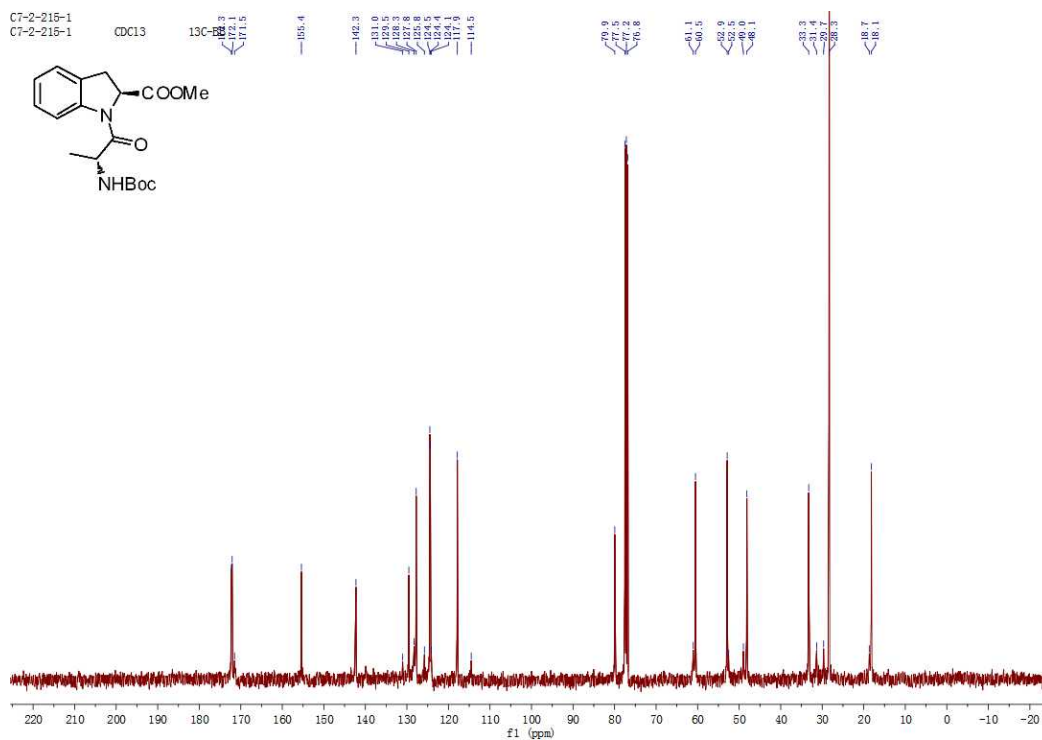

$^1\text{H}$  and  $^{13}\text{C}$  NMR spectra of **2j** (two amide rotamers, 1.5:1)

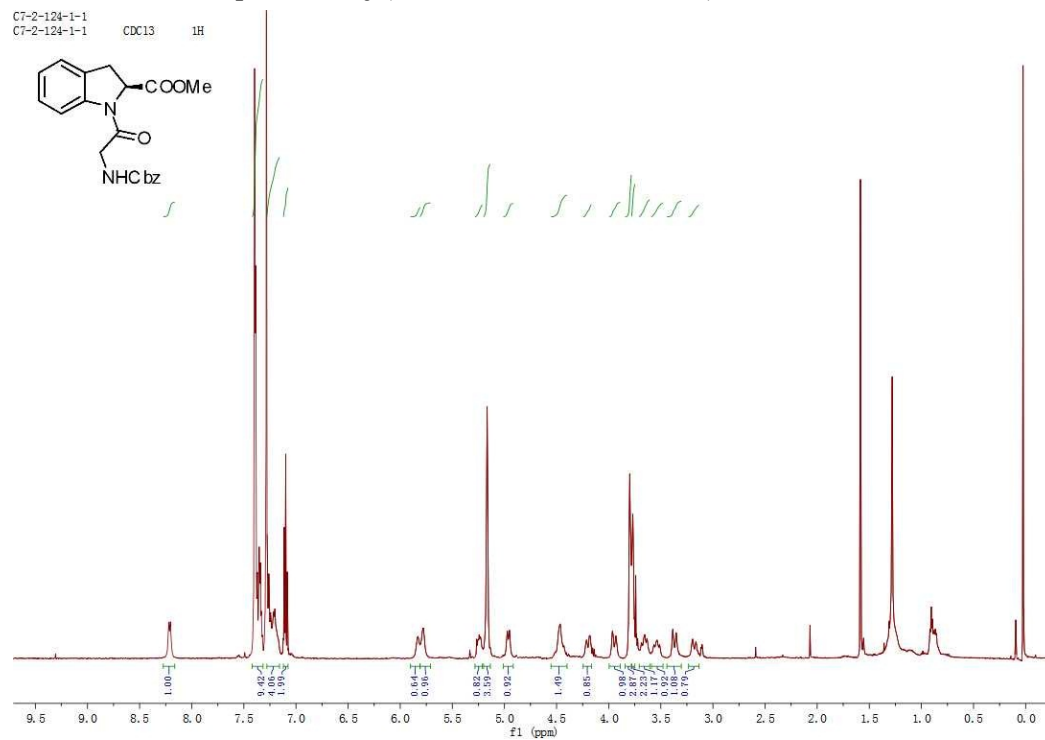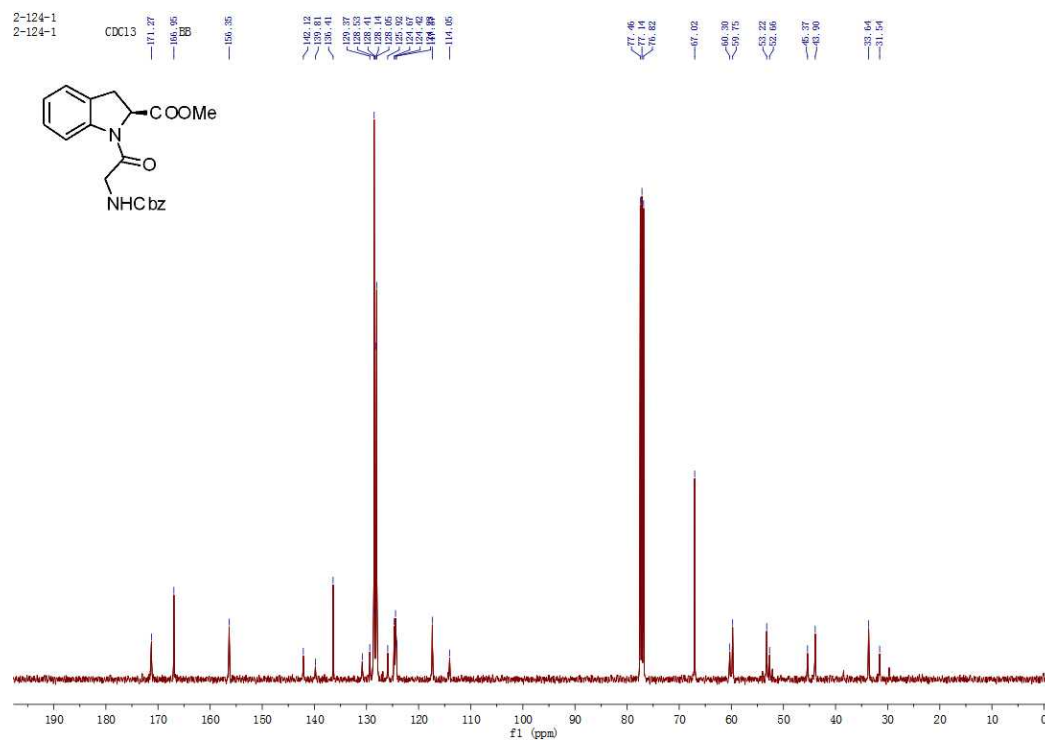



$^1\text{H}$  and  $^{13}\text{C}$  NMR spectra of **2k** (two amide rotamers, 1.1:1)

2-77-2  
2-77-2 CDCL<sub>3</sub> H

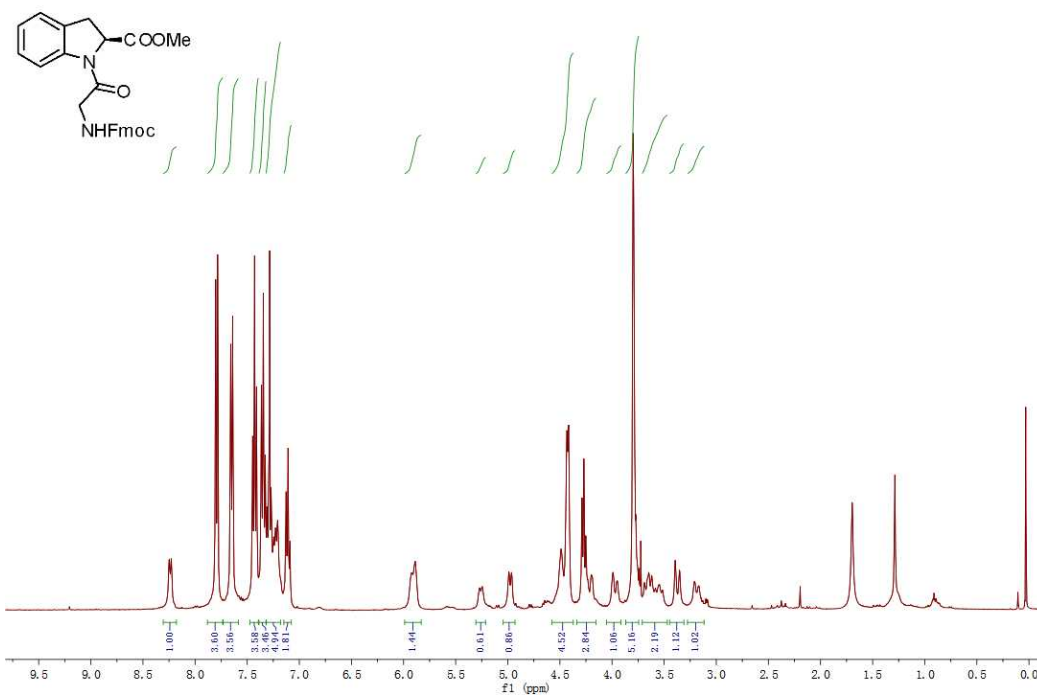

C7-2-77-2  
C7-2-77-2

CDCl<sub>3</sub> BB

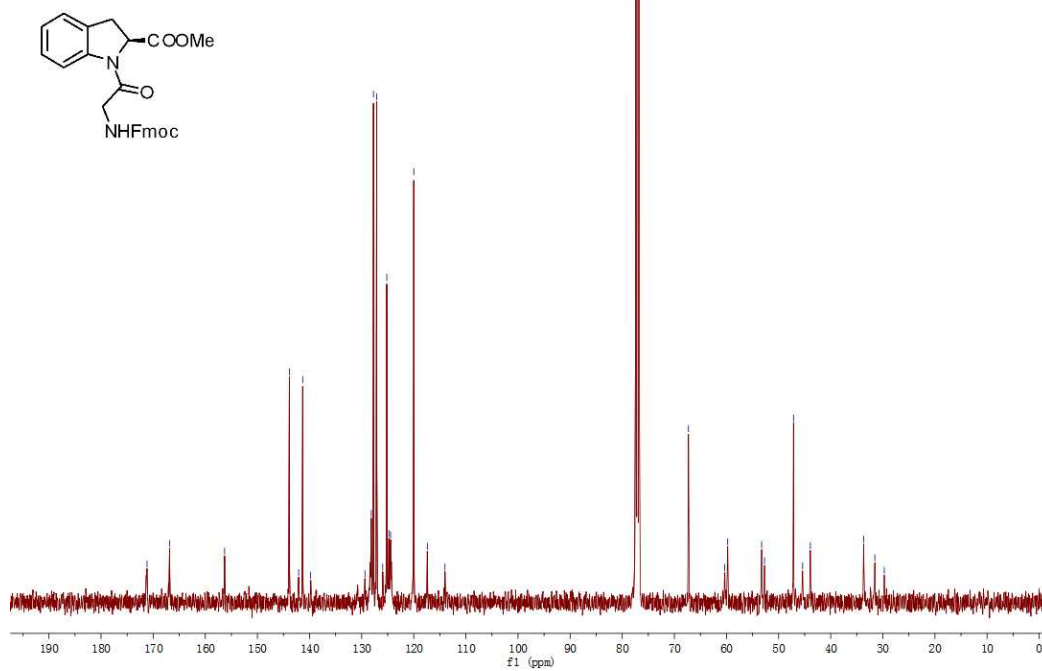

$^1\text{H}$  and  $^{13}\text{C}$  NMR spectra of **21** (two amide rotamers, 1.4:1)

2-39-2  
2-39-2 CDCl<sub>3</sub> 1H

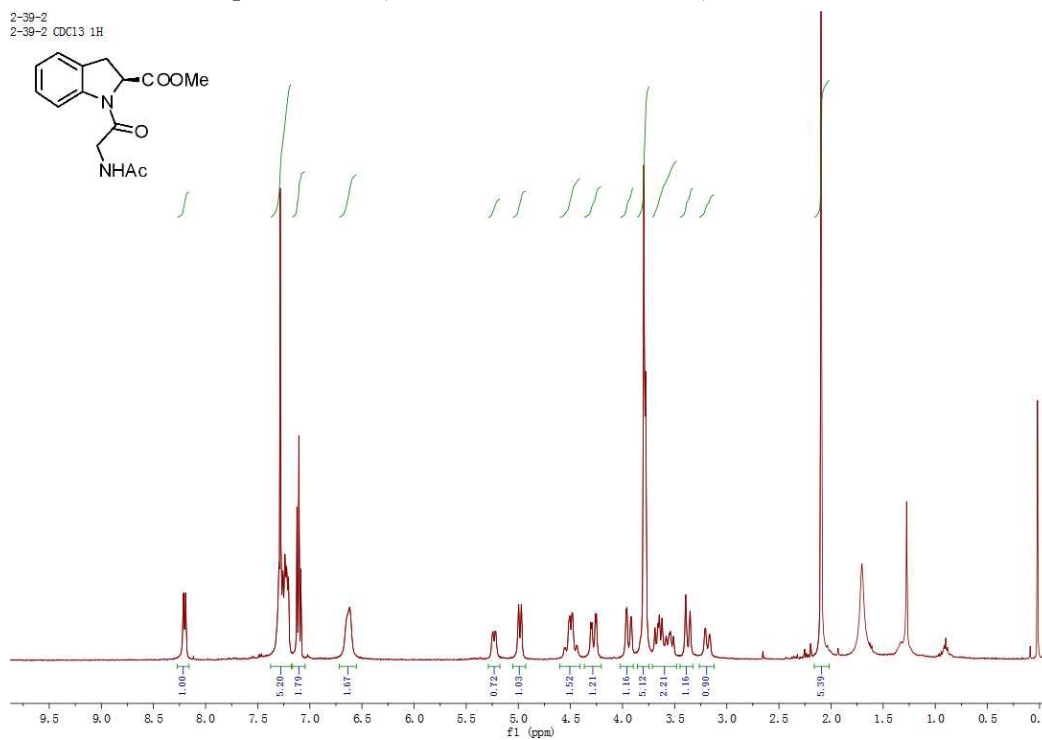

2-39-2  
2-39-2

CDCl<sub>3</sub> 13C-BB  
121.12  
120.20  
100.47

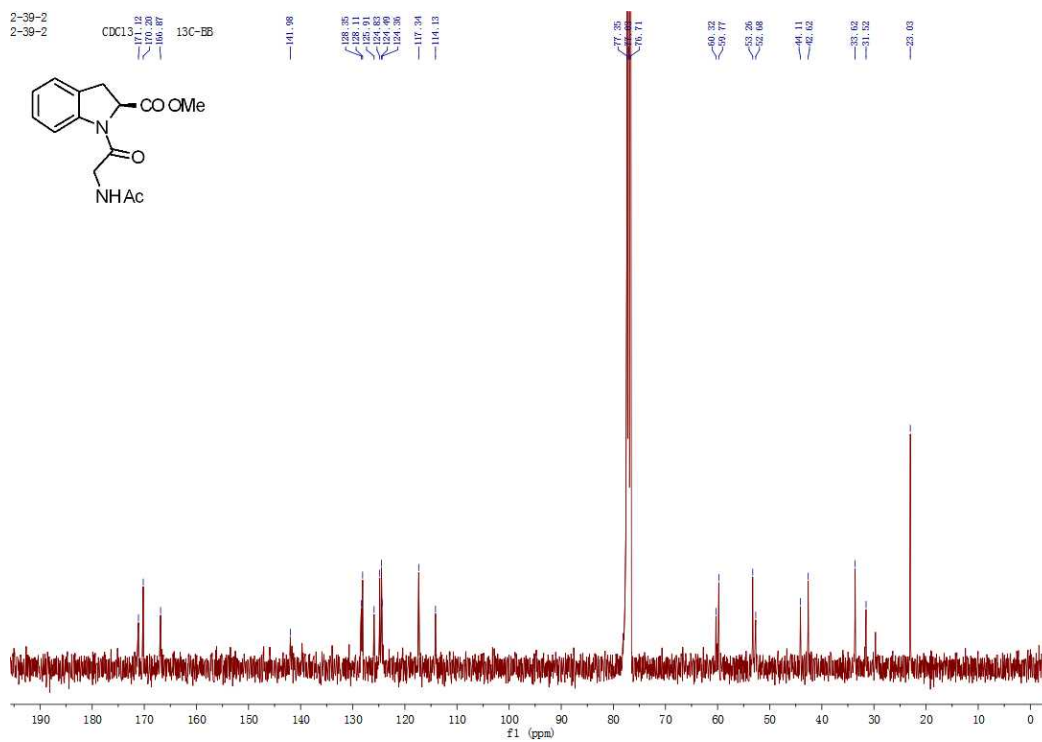

$^1\text{H}$  and  $^{13}\text{C}$  NMR spectra of **4a** (two amide rotamers, 2:1)

2-138-2  
2-138-2 CDC13  $^1\text{H}$

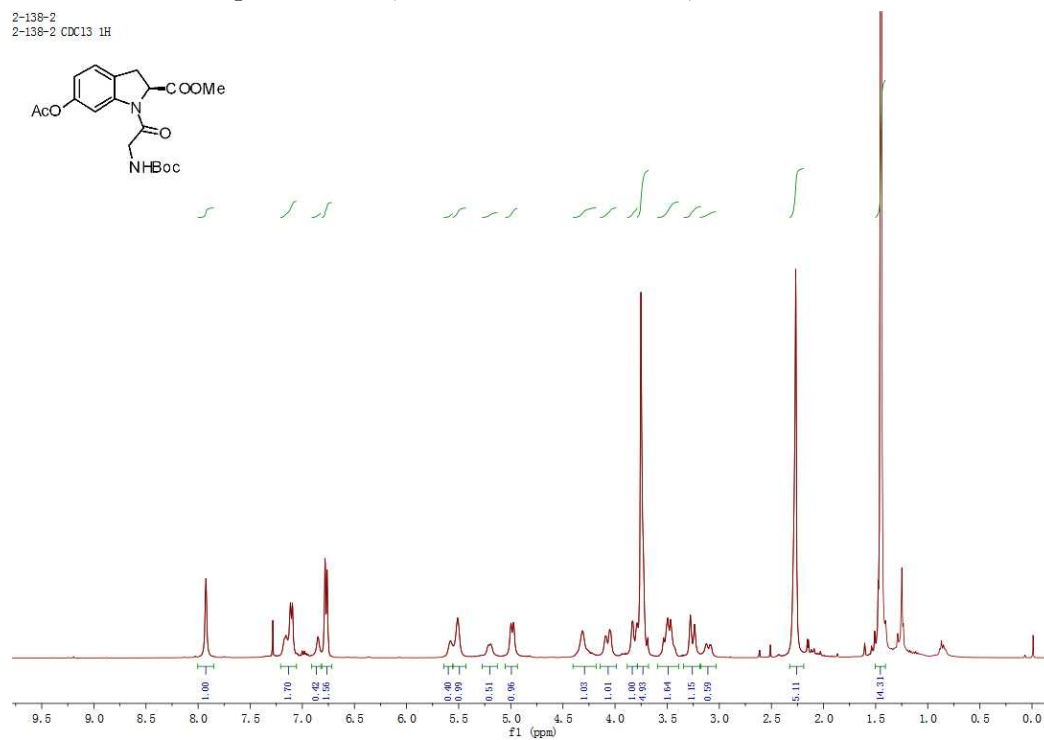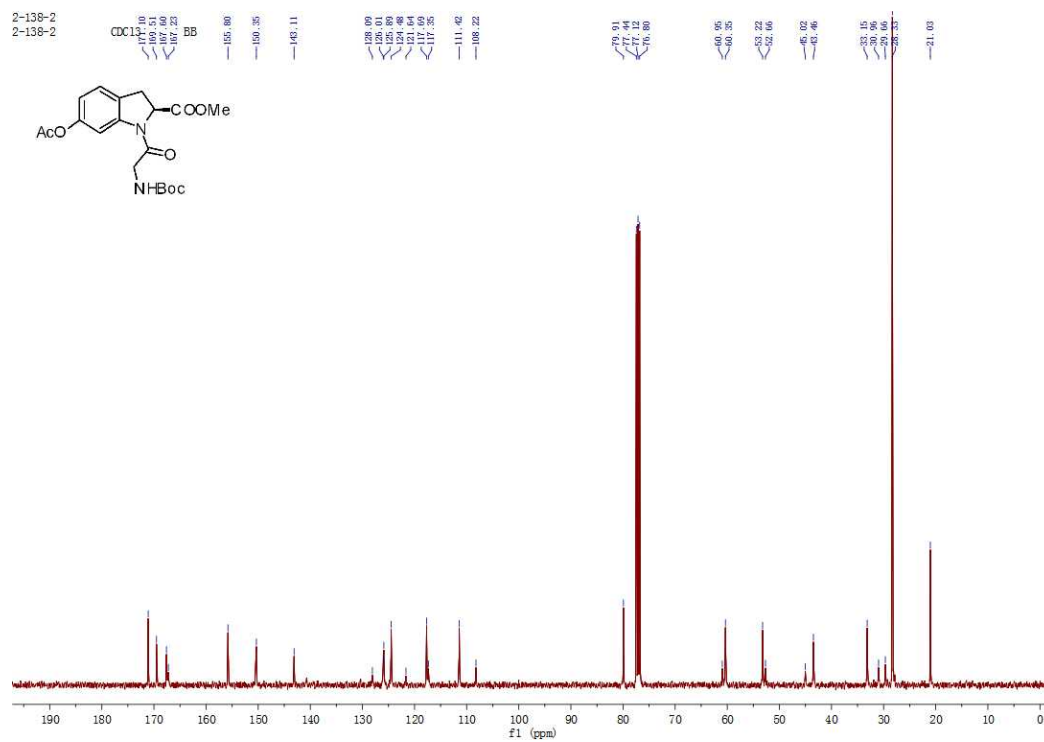

$^1\text{H}$  and  $^{13}\text{C}$  NMR spectra of **4b** (two amide rotamers, 1.9:1)

C7-4-308-1  
C7-4-308-1

CDC13  $^1\text{H}$

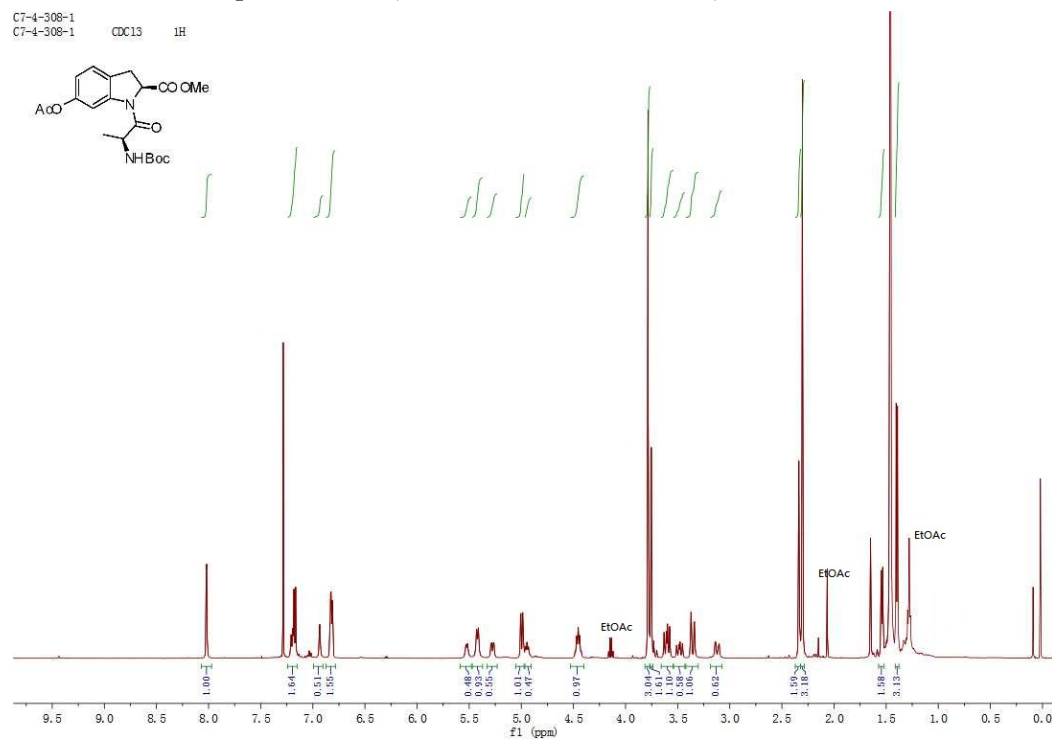

C7-4-308  
C7-4-308

CDC13  $^{13}\text{C}$ -BB

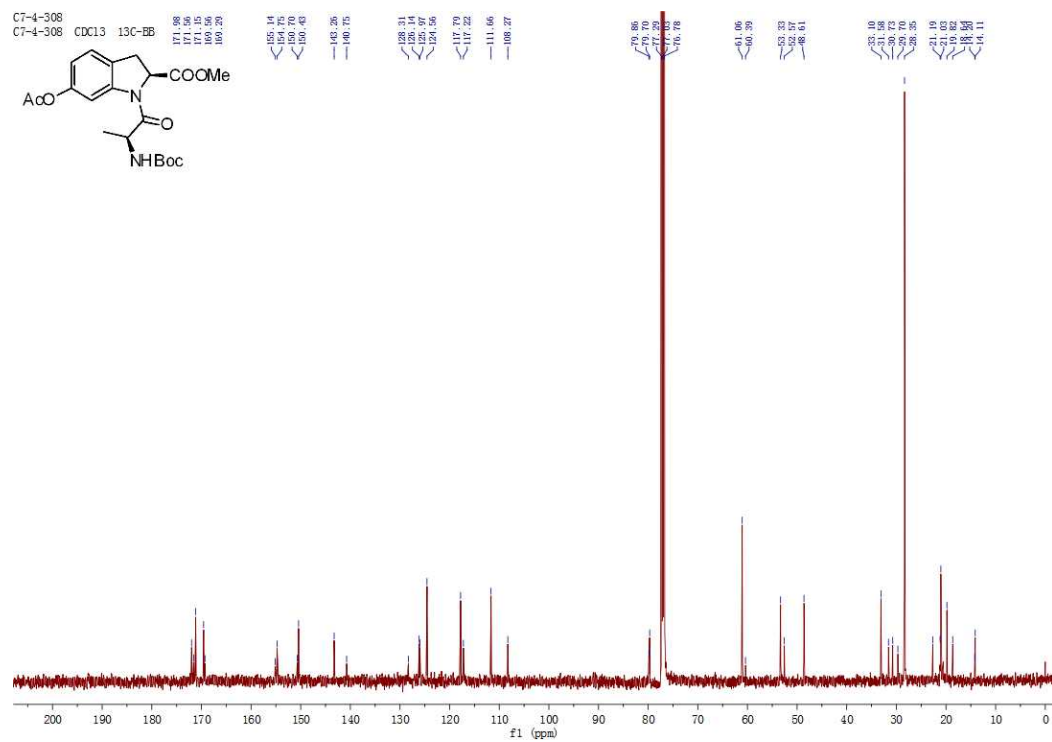

$^1\text{H}$  and  $^{13}\text{C}$  NMR spectra of **4c** (two amide rotamers, 10:1)

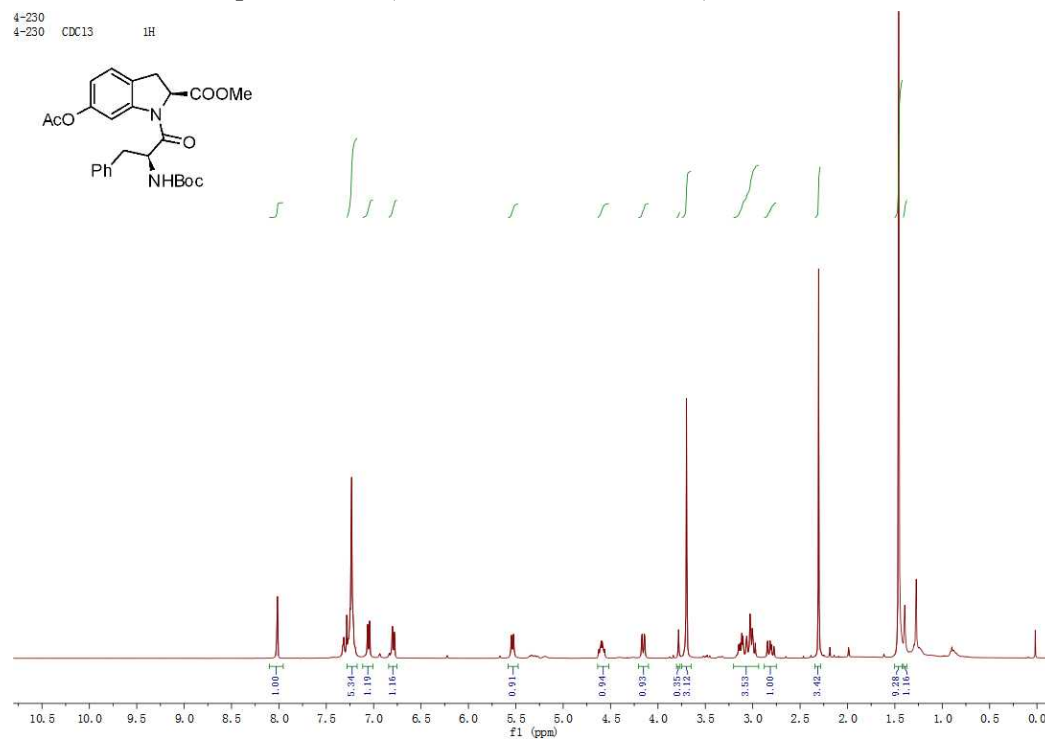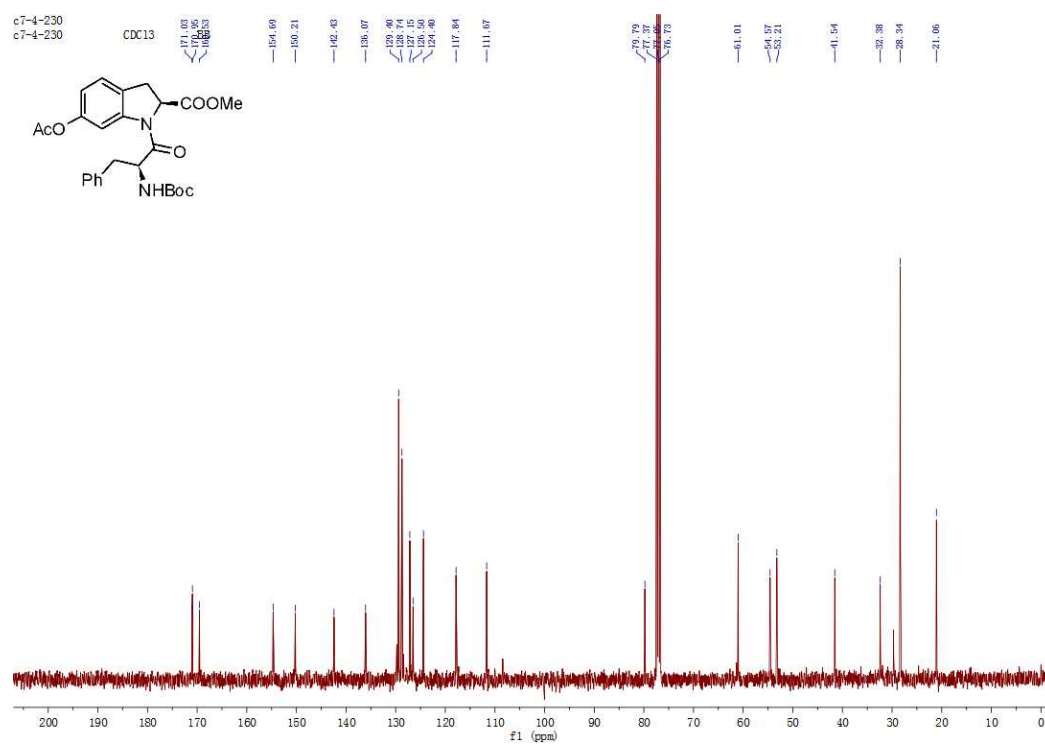

$^1\text{H}$  and  $^{13}\text{C}$  NMR spectra of **4d** (two amide rotamers, 3:1)

C7-4-309-1

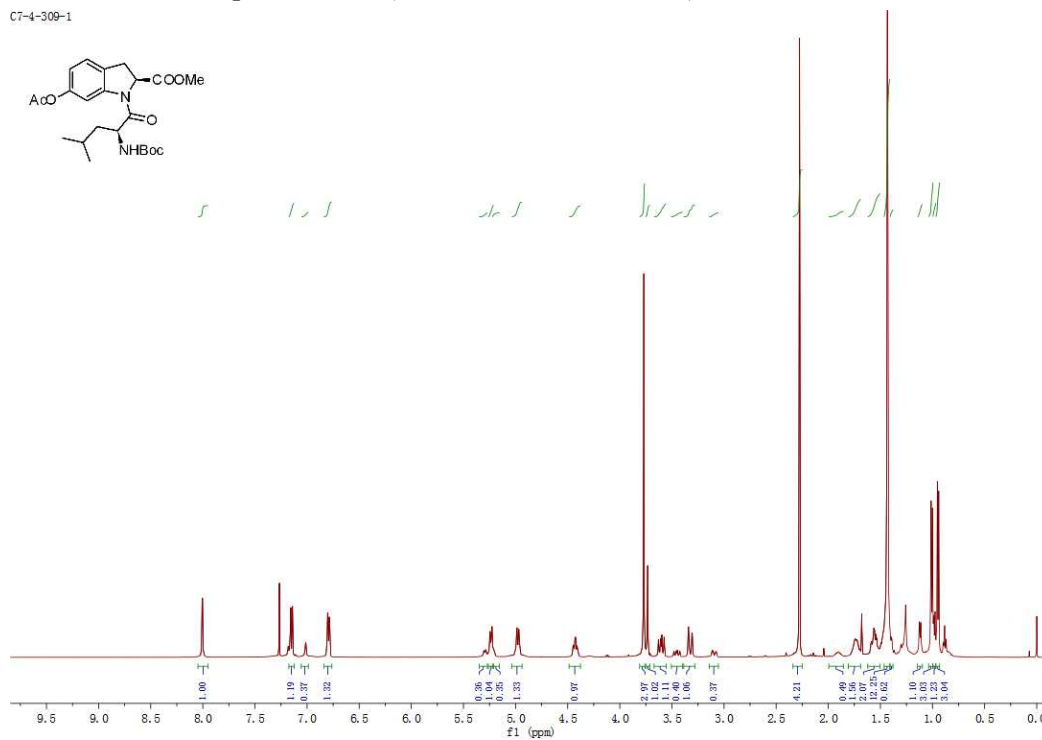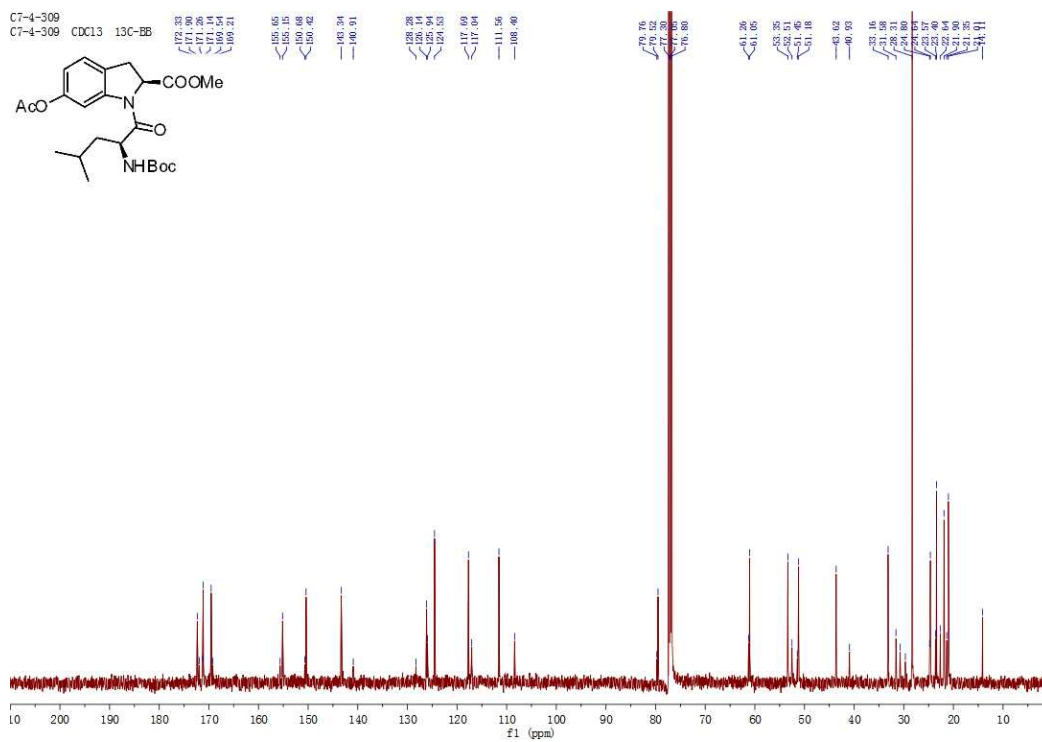

$^1\text{H}$  and  $^{13}\text{C}$  NMR spectra of **4e** (two amide rotamers, 2:1)

C7-2-150-1-1

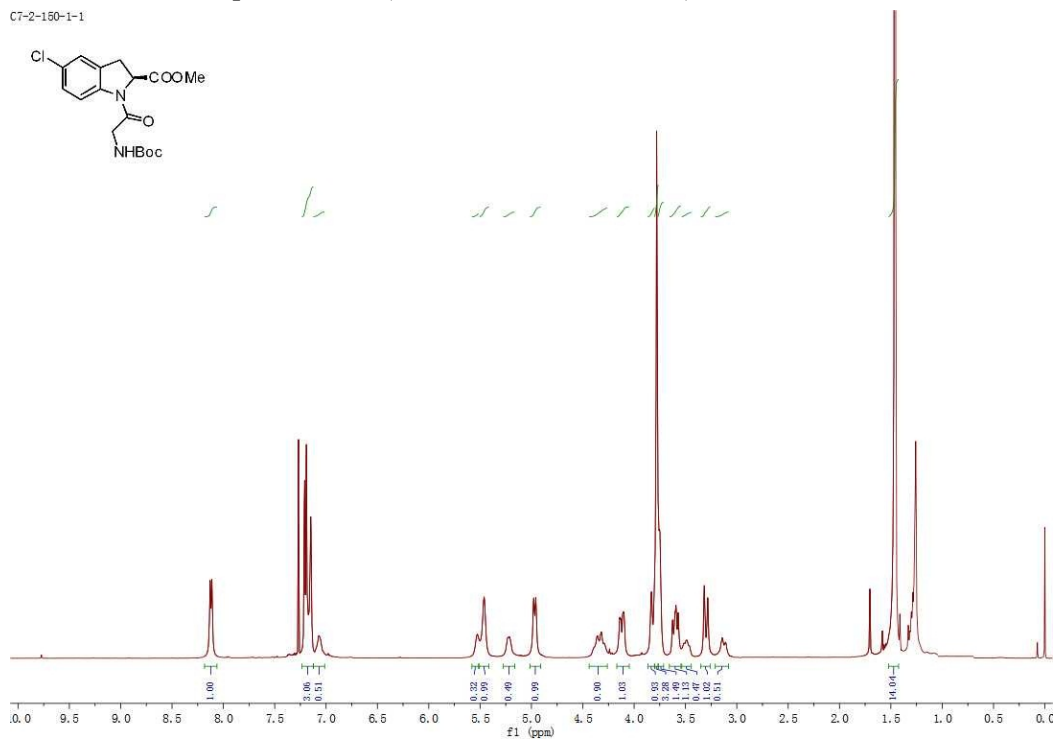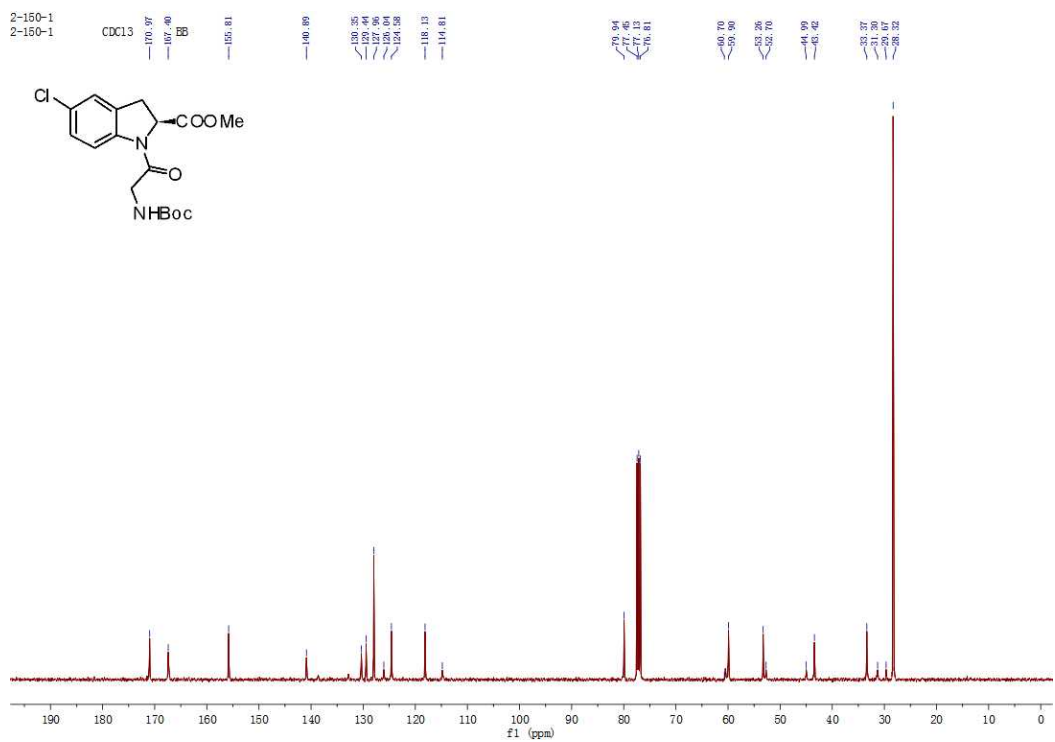

$^1\text{H}$  and  $^{13}\text{C}$  NMR spectra of **4f** (two amide rotamers, 1.4:1)

C7-2-149-1-1

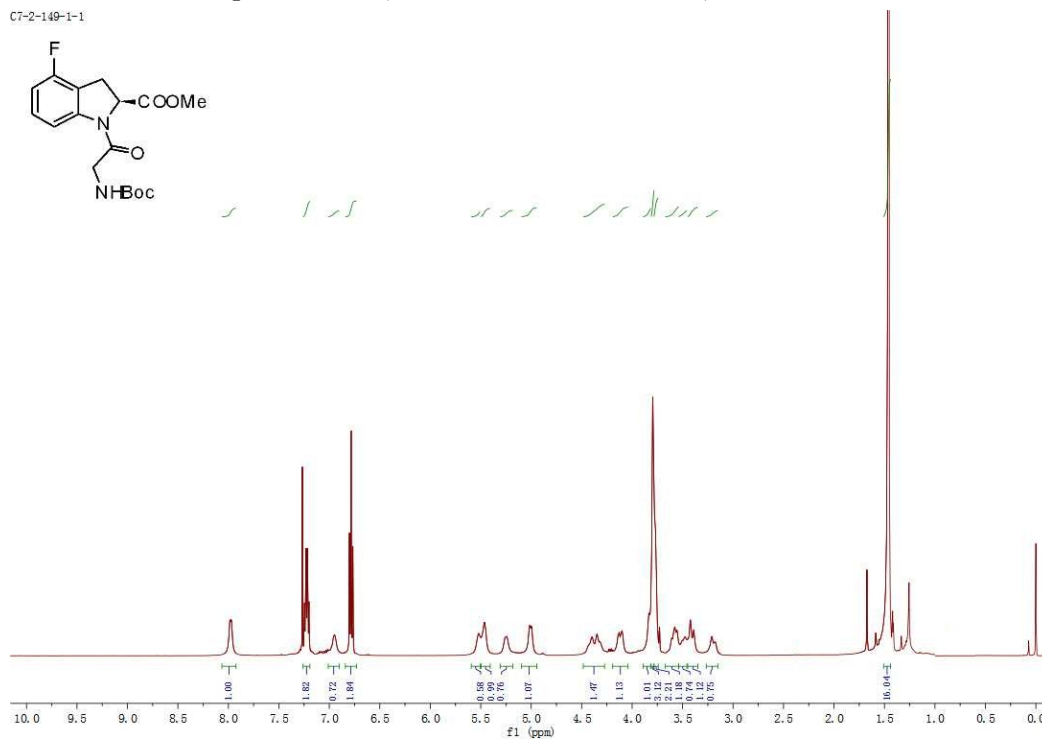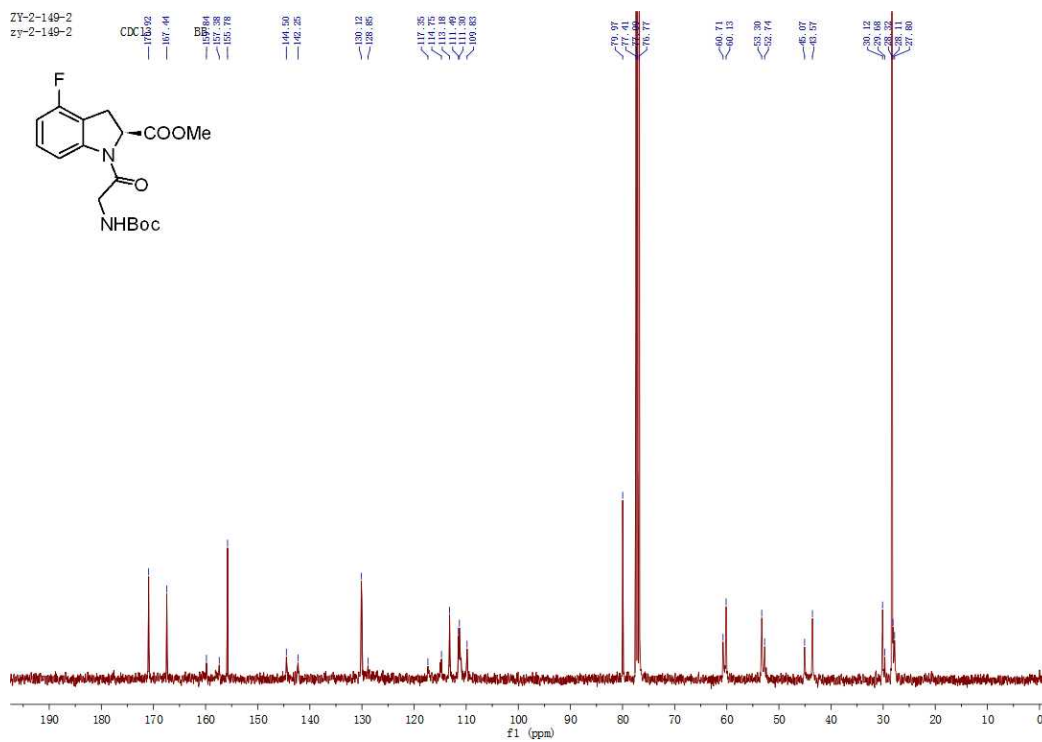



$^1\text{H}$  and  $^{13}\text{C}$  NMR spectra of **4g** (two amide rotamers, 3:1)

C7-2-148-1-1

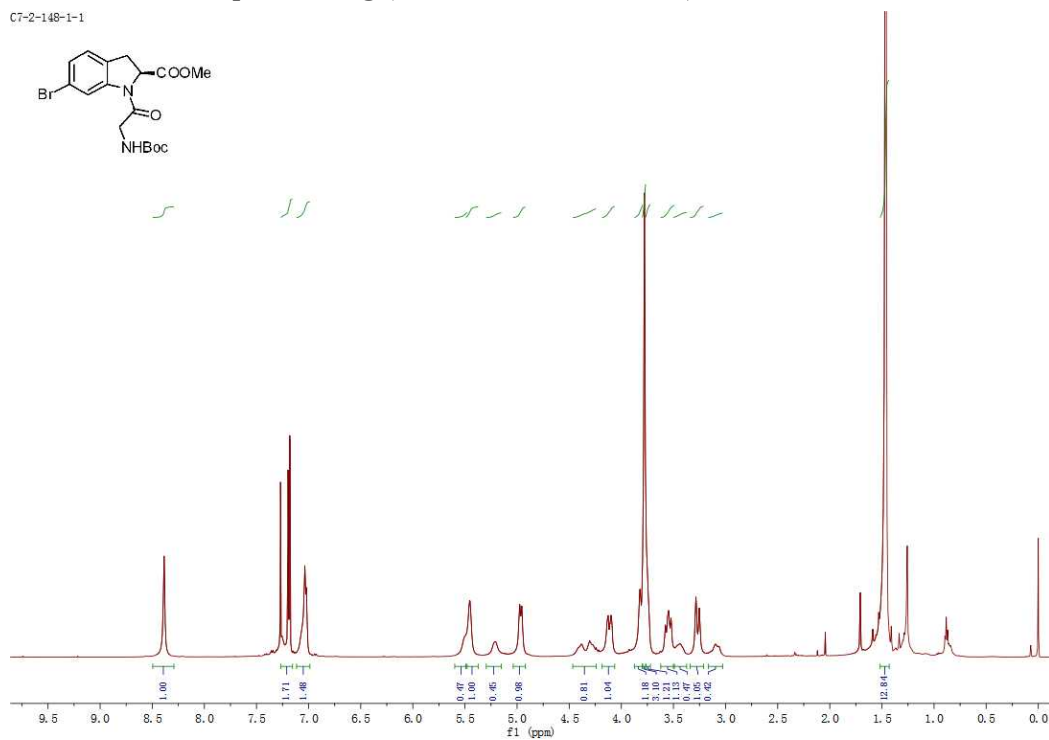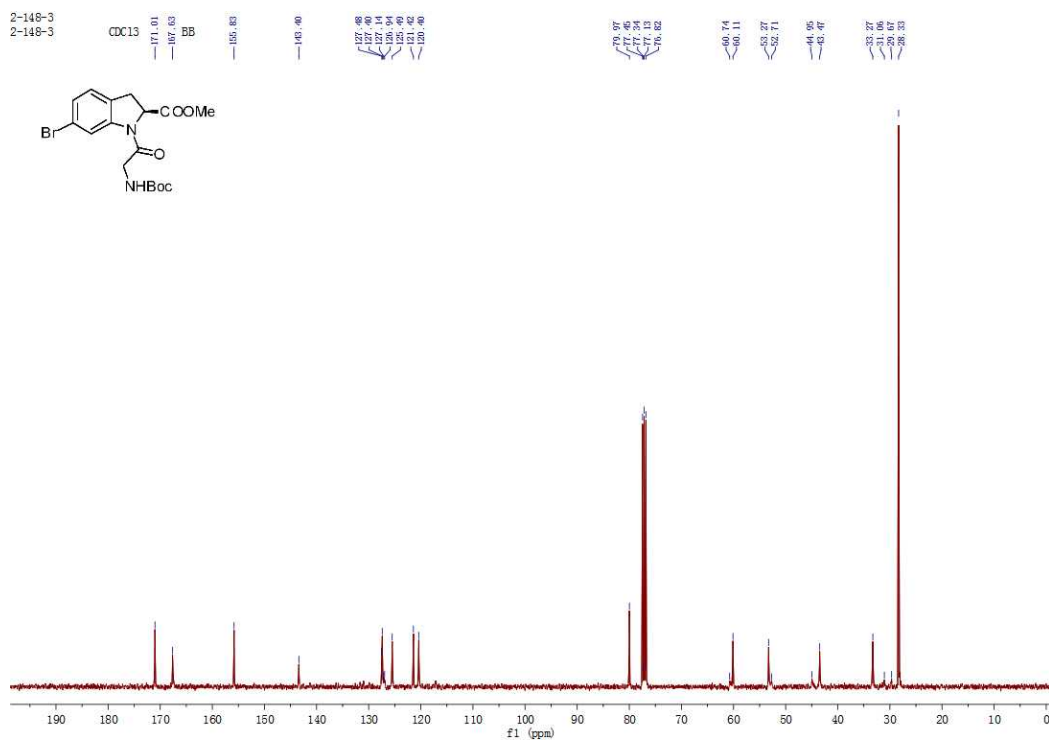

$^1\text{H}$  and  $^{13}\text{C}$  NMR spectra of **4h** (two amide rotamers, >20:1)

2-136-1  
2-136-1 CDCL<sub>3</sub> H

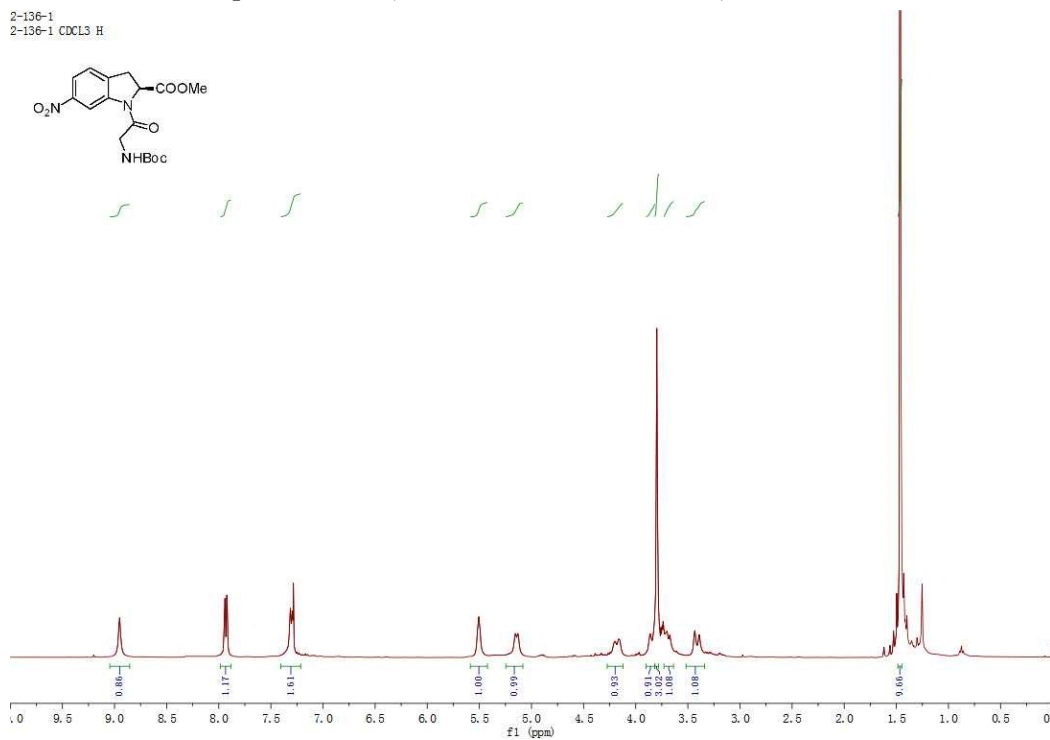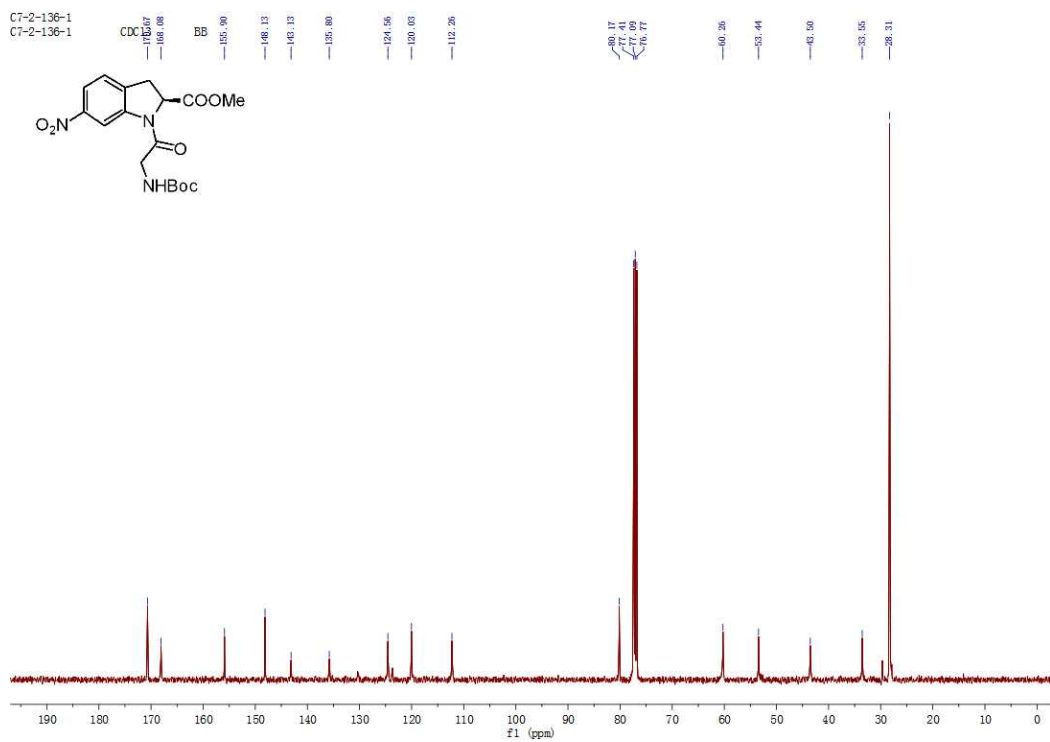

$^1\text{H}$  and  $^{13}\text{C}$  NMR spectra of **4i** (two amide rotamers, >20:1)

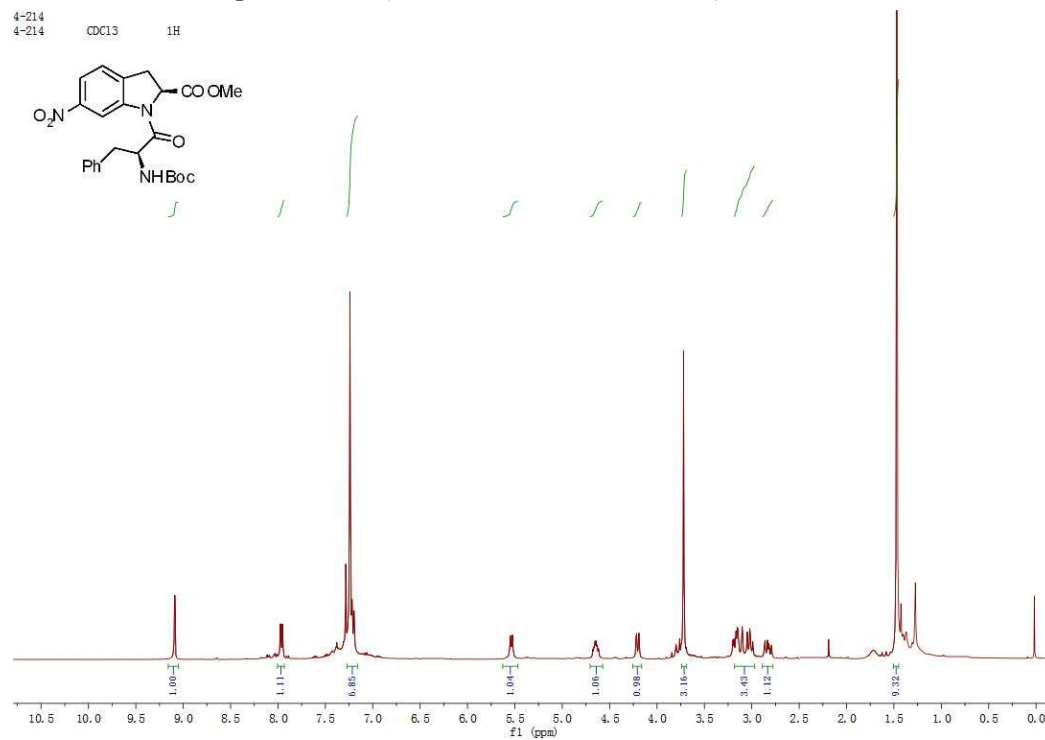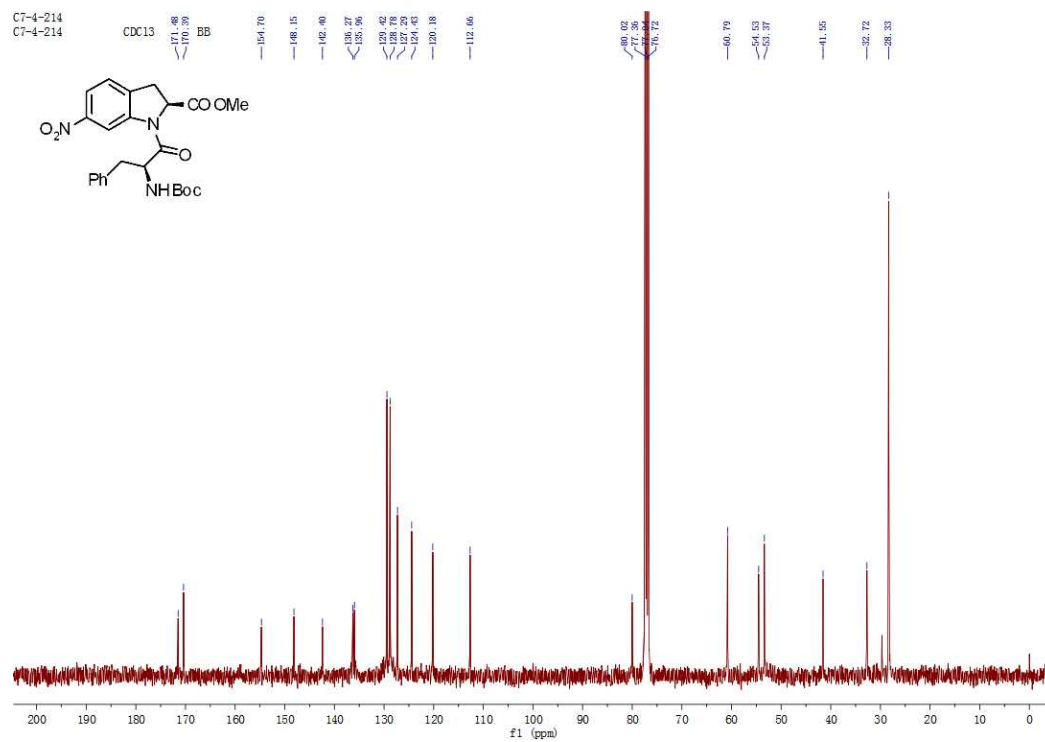

# <sup>1</sup>H and <sup>13</sup>C NMR spectra of **4j**

2-223-1  
2-223-1 CDCl<sub>3</sub> H

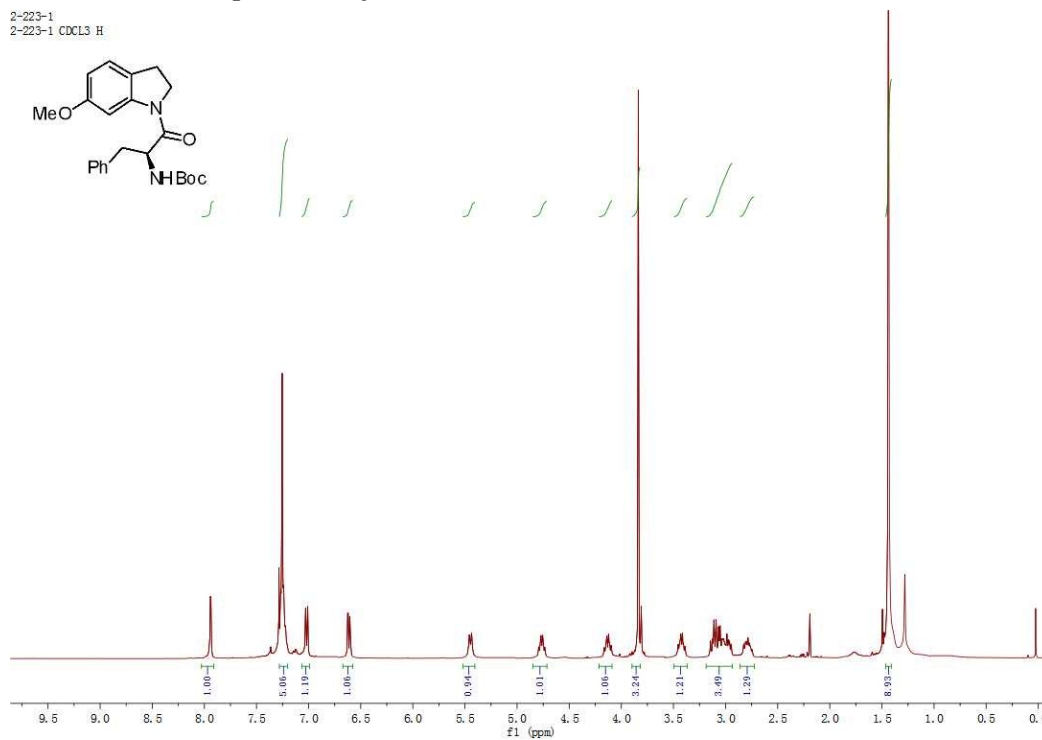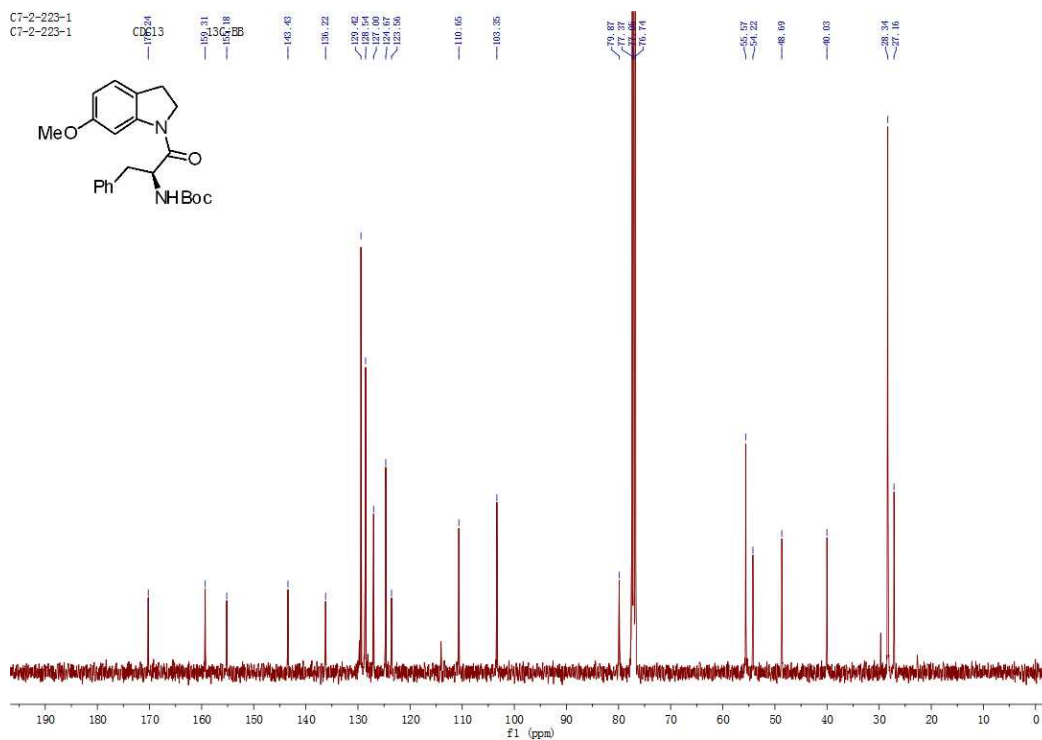

# <sup>1</sup>H and <sup>13</sup>C NMR spectra of **4k**

2-225-1  
2-225-1 CDCl<sub>3</sub> H

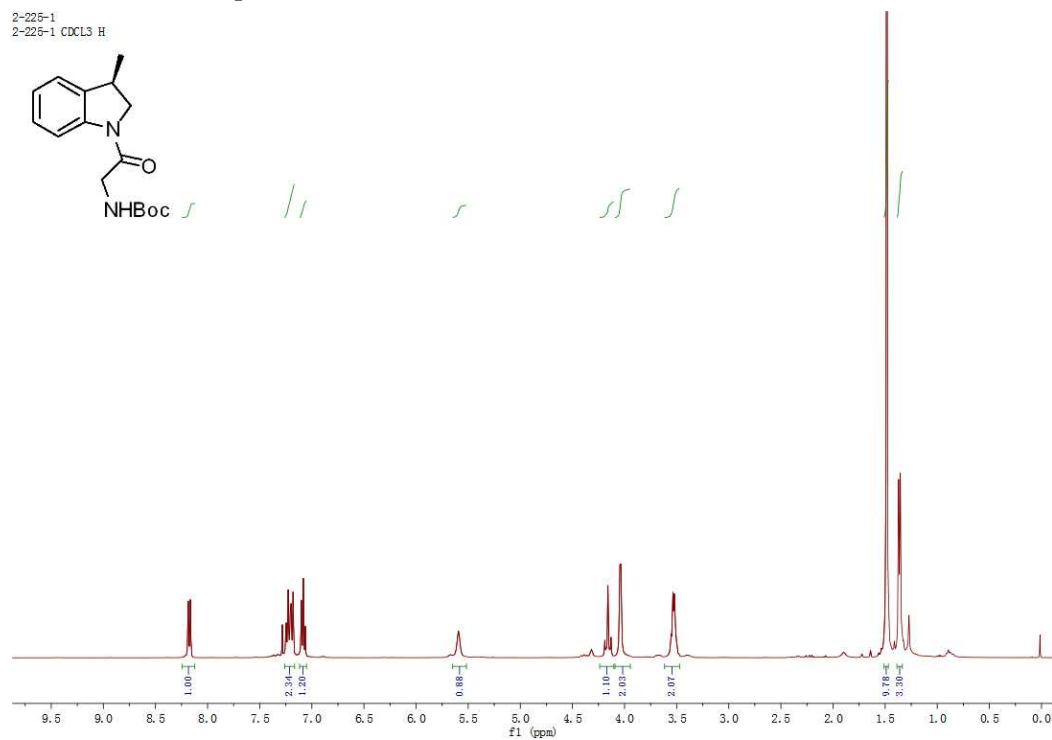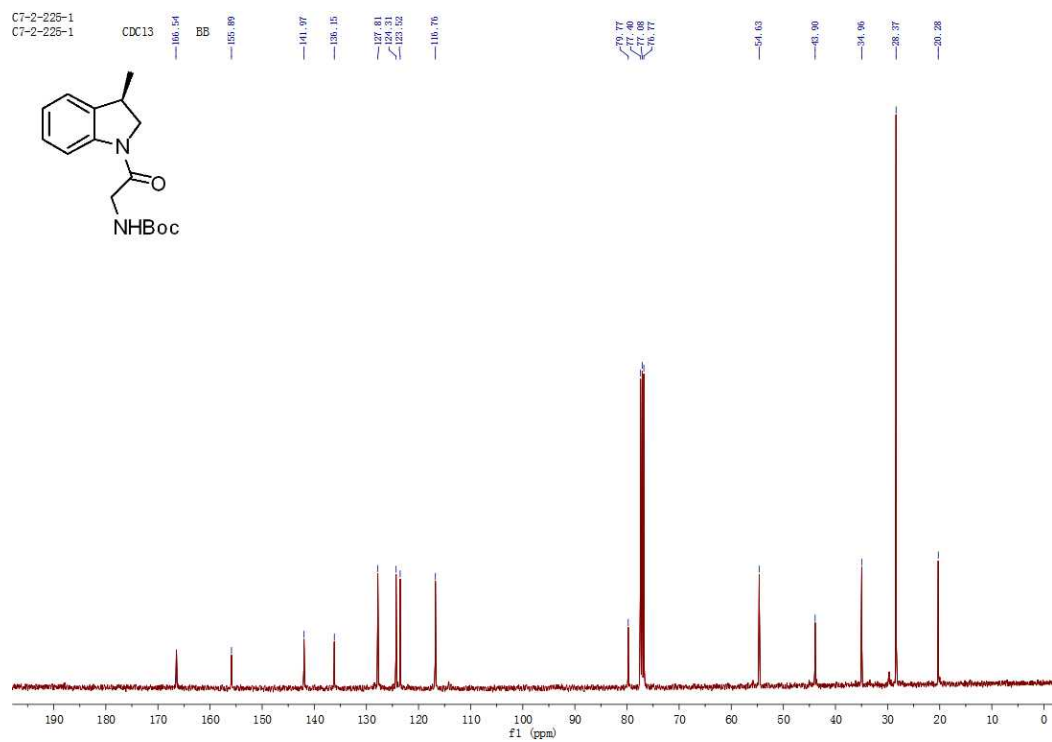

### Chiral HPLC of racemic **2a**

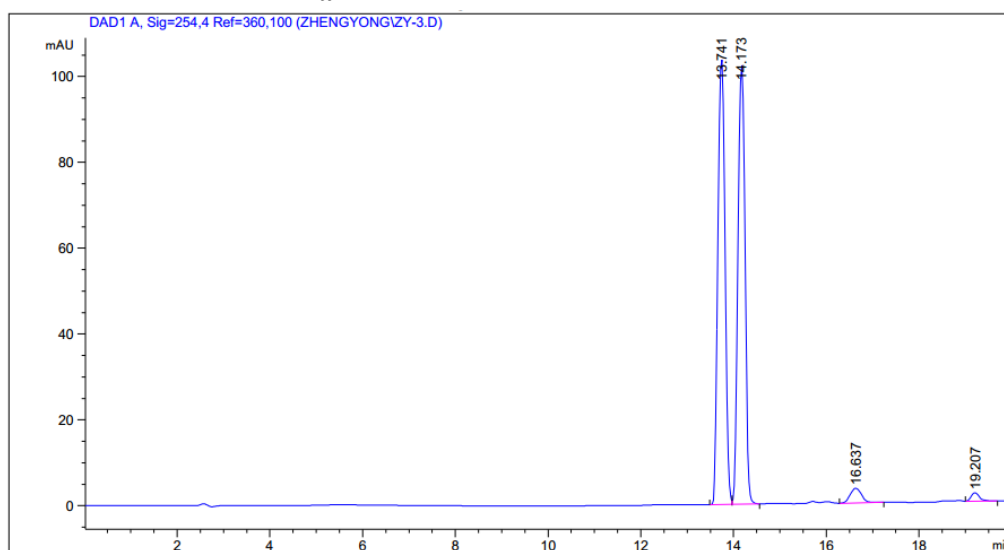

| Time (min) | Area (%) |
|------------|----------|
| 13.74      | 48.57    |
| 14.17      | 47.78    |
| 16.64      | 2.57     |
| 19.21      | 1.08     |

### Chiral HPLC of **2a**

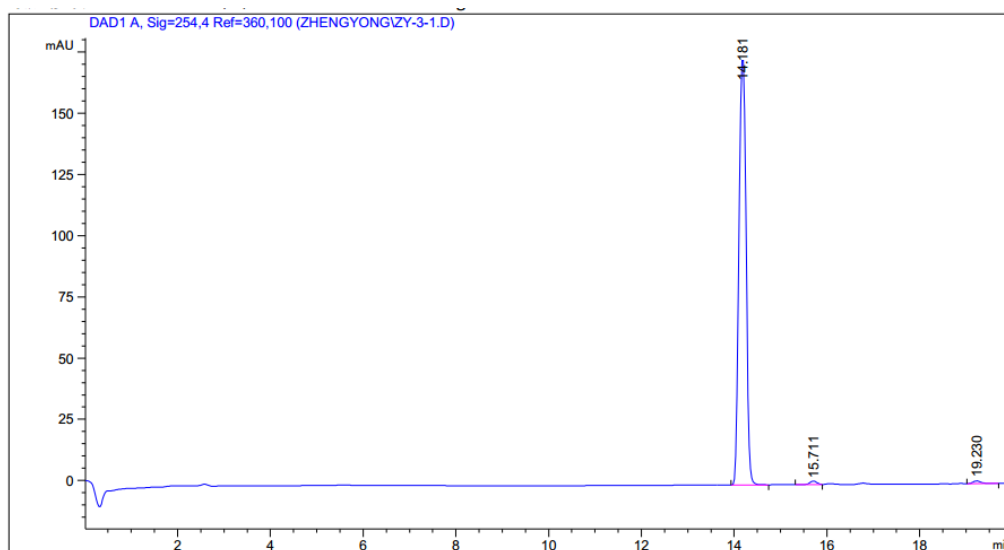

| Time (min) | Area (%) |
|------------|----------|
| 14.18      | 98.47    |
| 15.71      | 0.78     |
| 19.23      | 0.75     |

### Chiral HPLC of racemic **2b**

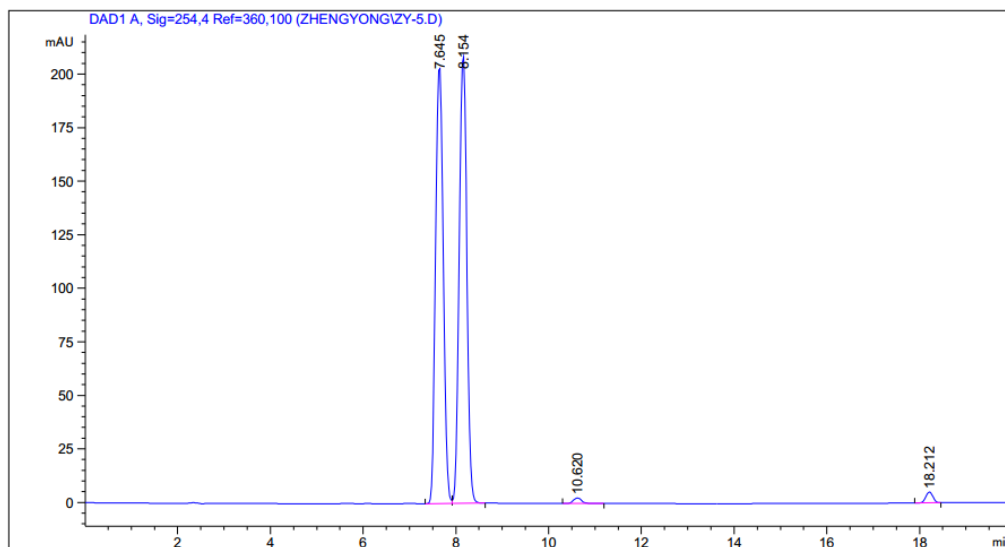

| Time (min) | Area (%) |
|------------|----------|
| 7.65       | 48.37    |
| 8.15       | 49.80    |
| 10.62      | 0.69     |
| 18.21      | 1.14     |

### Chiral HPLC of **2b**

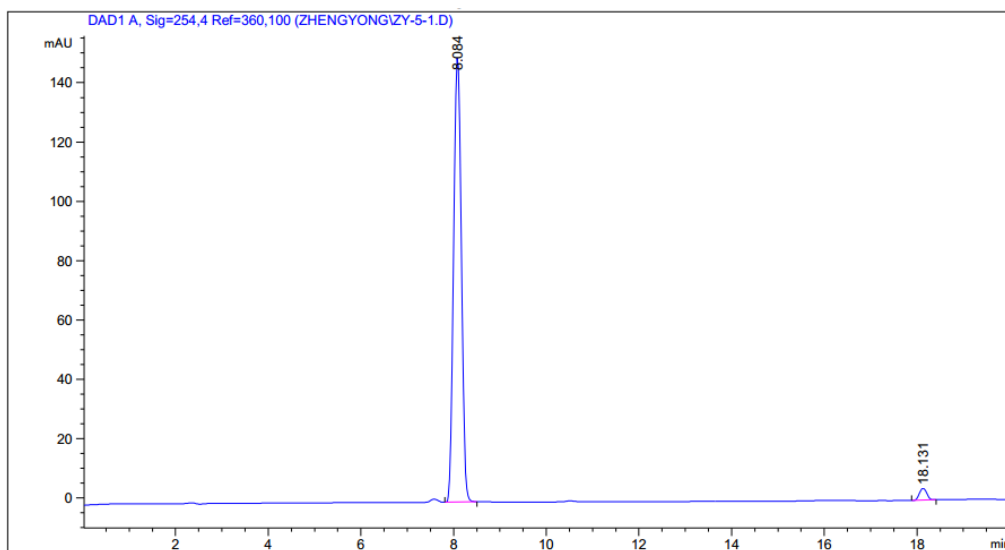

| Time (min) | Area (%) |
|------------|----------|
| 8.08       | 97.49    |
| 18.13      | 2.51     |
